# Supplementary material for: Enantioselective synthesis of pyrazolone derivatives catalysed by a chiral squaramide catalyst
Source: Royal Society of Chemistry journal article supplement (doi:10.1039/c3ra45974h), 2014-01-01
Supplement: c3ra45974h1.pdf [file c3ra45974h1.pdf]

# Enantioselective Synthesis of Pyrazolone Derivatives Catalysed by a Chiral Squaramide Catalyst

Jun-Hua Li, Da-Ming Du\*

*School of Chemical Engineering and Environment, Beijing Institute of Technology,  
Beijing 100081, People's Republic of China*

[dudm@bit.edu.cn](mailto:dudm@bit.edu.cn)

## *Supporting Information*

### **Contents**

|                                                                           |     |
|---------------------------------------------------------------------------|-----|
| The protection of compounds <b>3</b> to compounds <b>5</b> .....          | S1  |
| Copies of <sup>1</sup> H and <sup>13</sup> C NMR spectra of products..... | S2  |
| Copies of HPLC chromatographs of products.....                            | S18 |

## The protection of compounds **3** to compounds **5**

A mixture of **3** (one equivalent), di-tert-butyl dicarbonate (two equivalent) and anhydrous potassium carbonate (0.2 equivalent) in CH<sub>2</sub>Cl<sub>2</sub> (2 mL) was stirred at room temperature for 2 hours. Then the mixture was concentrated and purified by silica gel column chromatography (with ethyl acetate–petroleum ether 1:8 as the eluent) to afford the desired products **5**.

**Table S1. Yields of compounds **5****

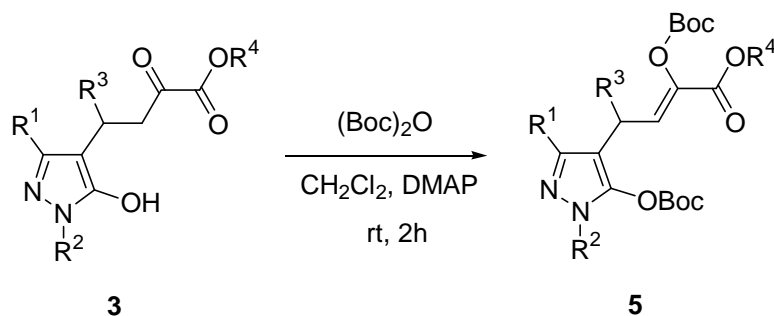

| Entry | R <sup>1</sup>  | R <sup>2</sup>                    | R <sup>3</sup>                     | R <sup>4</sup> | Reactant  | Product   | Yield (%) |
|-------|-----------------|-----------------------------------|------------------------------------|----------------|-----------|-----------|-----------|
| 1     | Me              | Ph                                | Ph                                 | Me             | <b>3a</b> | <b>5a</b> | 47        |
| 2     | Me              | Ph                                | 4-ClC <sub>6</sub> H <sub>4</sub>  | Me             | <b>3b</b> | <b>5b</b> | 52        |
| 3     | Me              | Ph                                | 4-BrC <sub>6</sub> H <sub>4</sub>  | Me             | <b>3c</b> | <b>5c</b> | 35        |
| 4     | Me              | Ph                                | 4-FC <sub>6</sub> H <sub>4</sub>   | Me             | <b>3d</b> | <b>5d</b> | 52        |
| 5     | Me              | Ph                                | 4-MeC <sub>6</sub> H <sub>4</sub>  | Me             | <b>3e</b> | <b>5e</b> | 47        |
| 6     | Me              | Ph                                | 4-MeOC <sub>6</sub> H <sub>4</sub> | Me             | <b>3f</b> | <b>5f</b> | 61        |
| 7     | Me              | 4-ClC <sub>6</sub> H <sub>4</sub> | Ph                                 | Me             | <b>3g</b> | <b>5g</b> | 17        |
| 8     | Me              | 4-MeC <sub>6</sub> H <sub>4</sub> | Ph                                 | Me             | <b>3h</b> | <b>5h</b> | 46        |
| 9     | CF <sub>3</sub> | Ph                                | Ph                                 | Me             | <b>3i</b> | <b>5i</b> | 43        |
| 10    | Ph              | Ph                                | Ph                                 | Me             | <b>3j</b> | <b>5j</b> | 56        |
| 11    | Me              | Ph                                | Ph                                 | Bn             | <b>3k</b> | <b>5k</b> | 40        |
| 12    | Me              | Ph                                | Ph                                 | Allyl          | <b>3l</b> | <b>5l</b> | 38        |
| 13    | Ph              | Ph                                | 4-BrC <sub>6</sub> H <sub>4</sub>  | Me             | <b>3m</b> | <b>5m</b> | 73        |
| 14    | CF <sub>3</sub> | Ph                                | 4-BrC <sub>6</sub> H <sub>4</sub>  | Me             | <b>3n</b> | <b>5n</b> | 65        |
| 15    | Et              | Ph                                | Ph                                 | Me             | <b>3o</b> | <b>5o</b> | 72        |

Copies of  $^1\text{H}$  and  $^{13}\text{C}$  NMR spectra of products

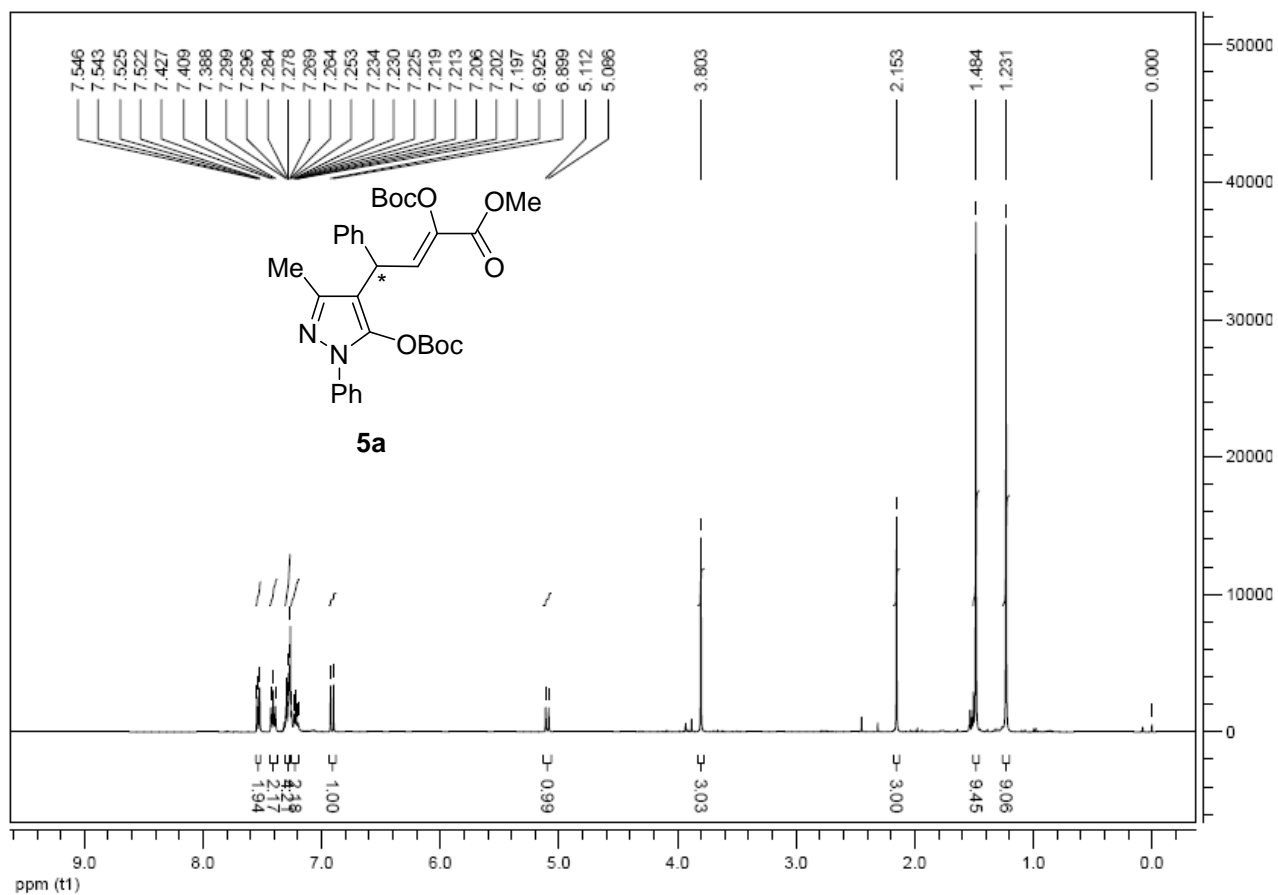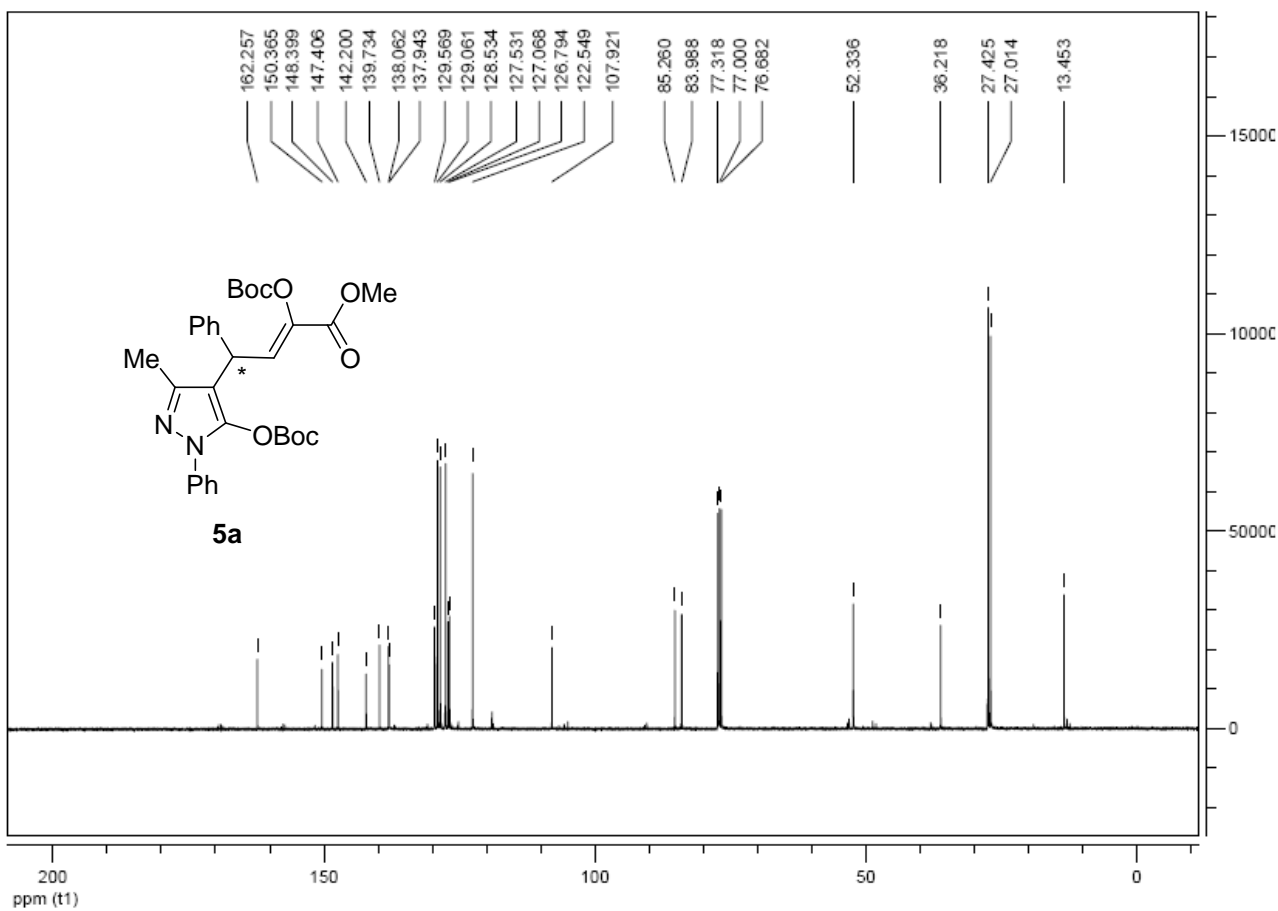

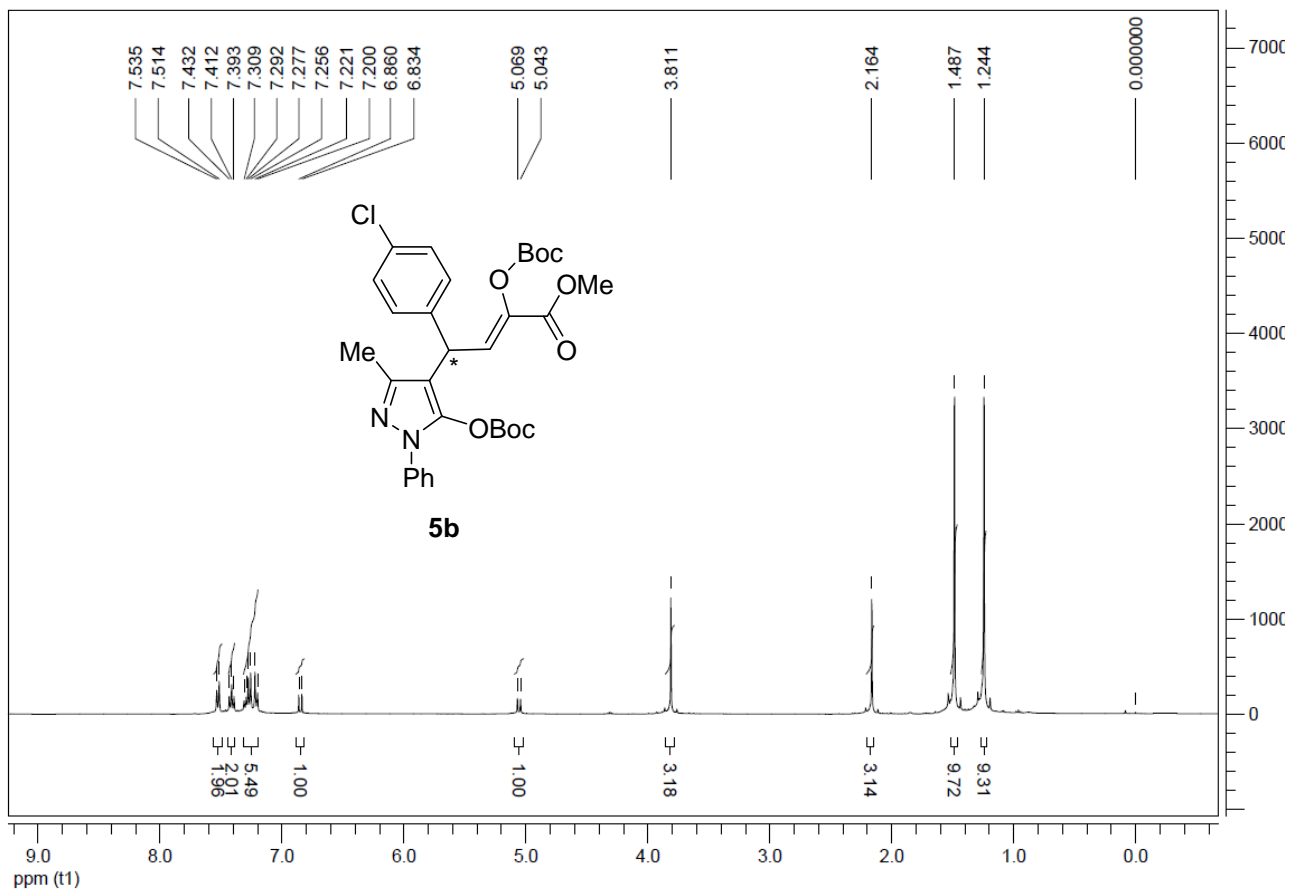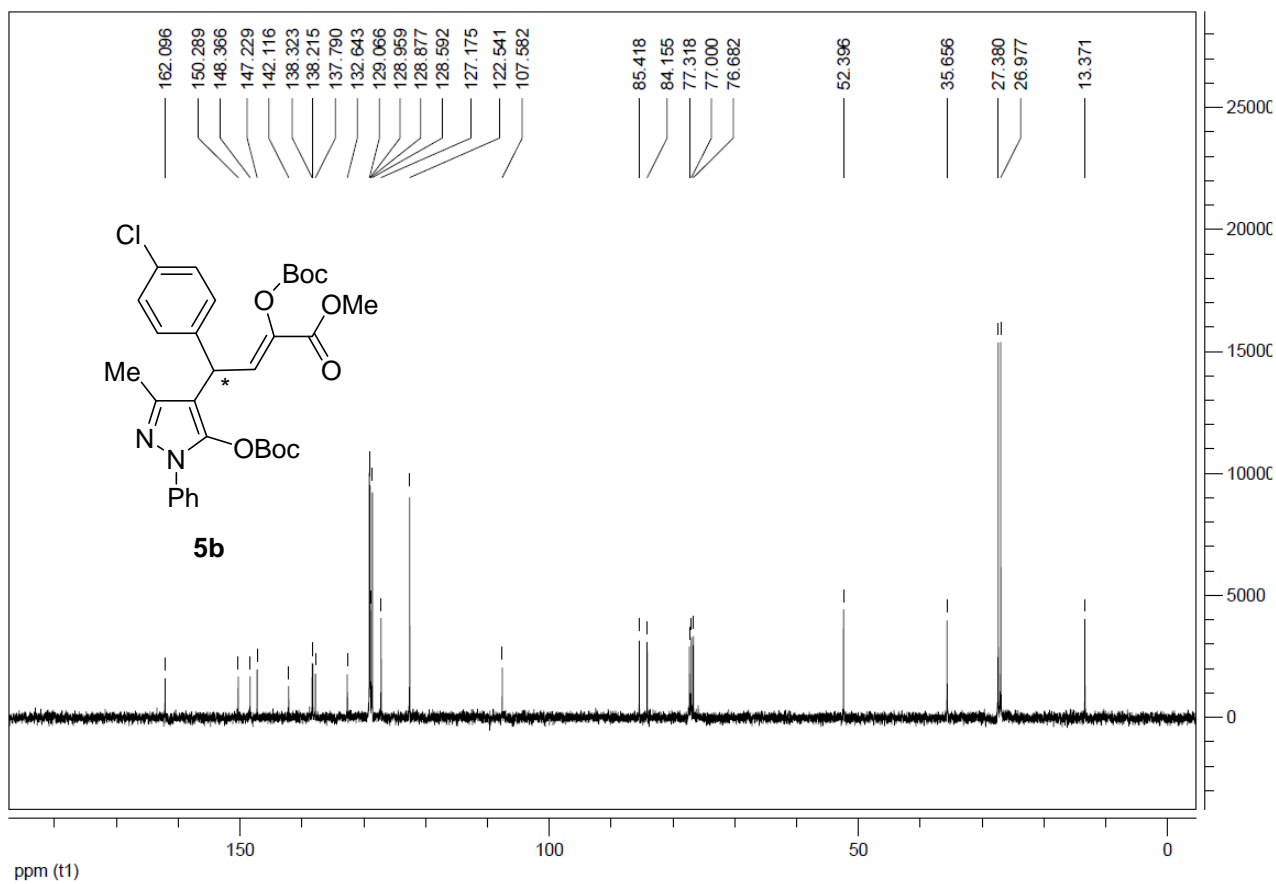

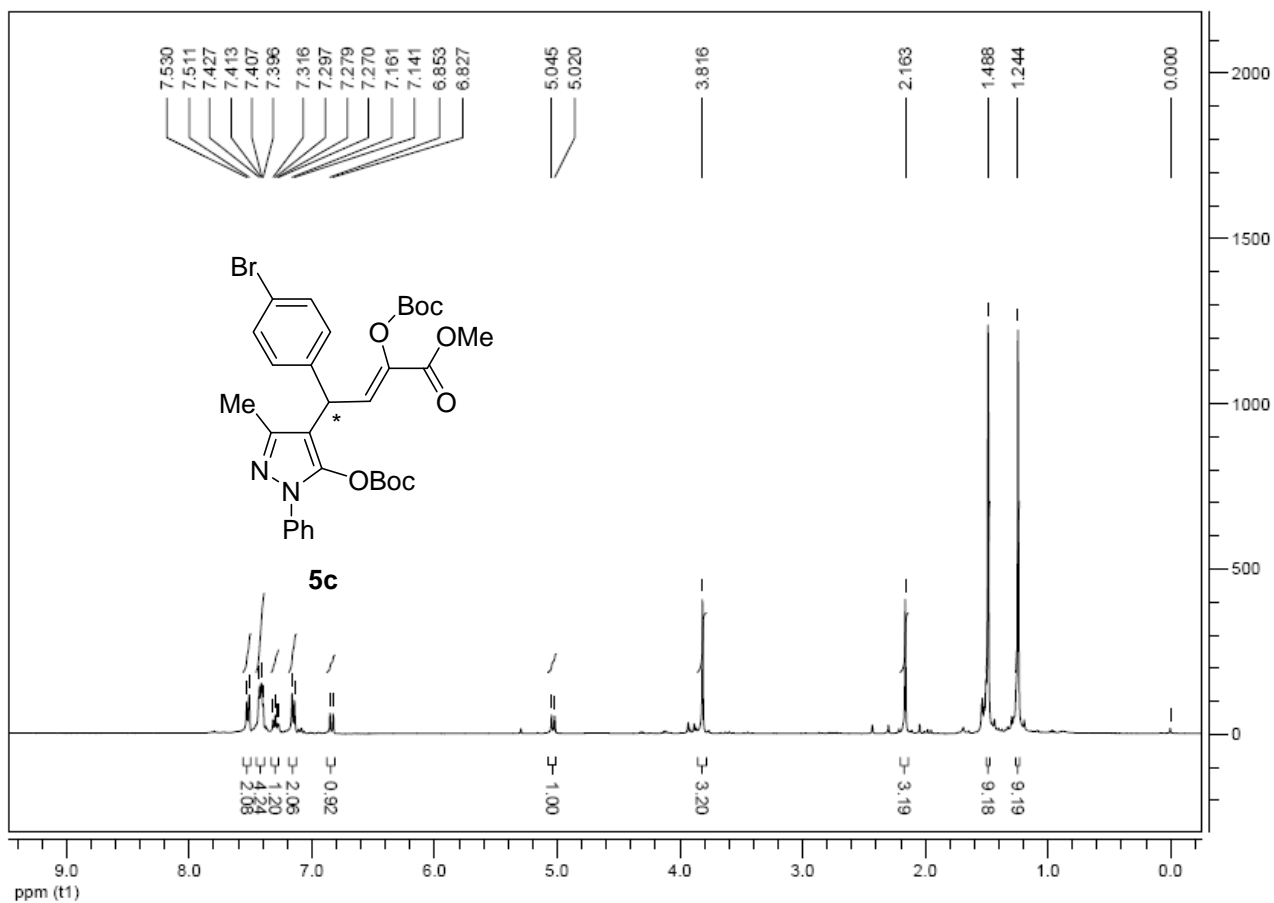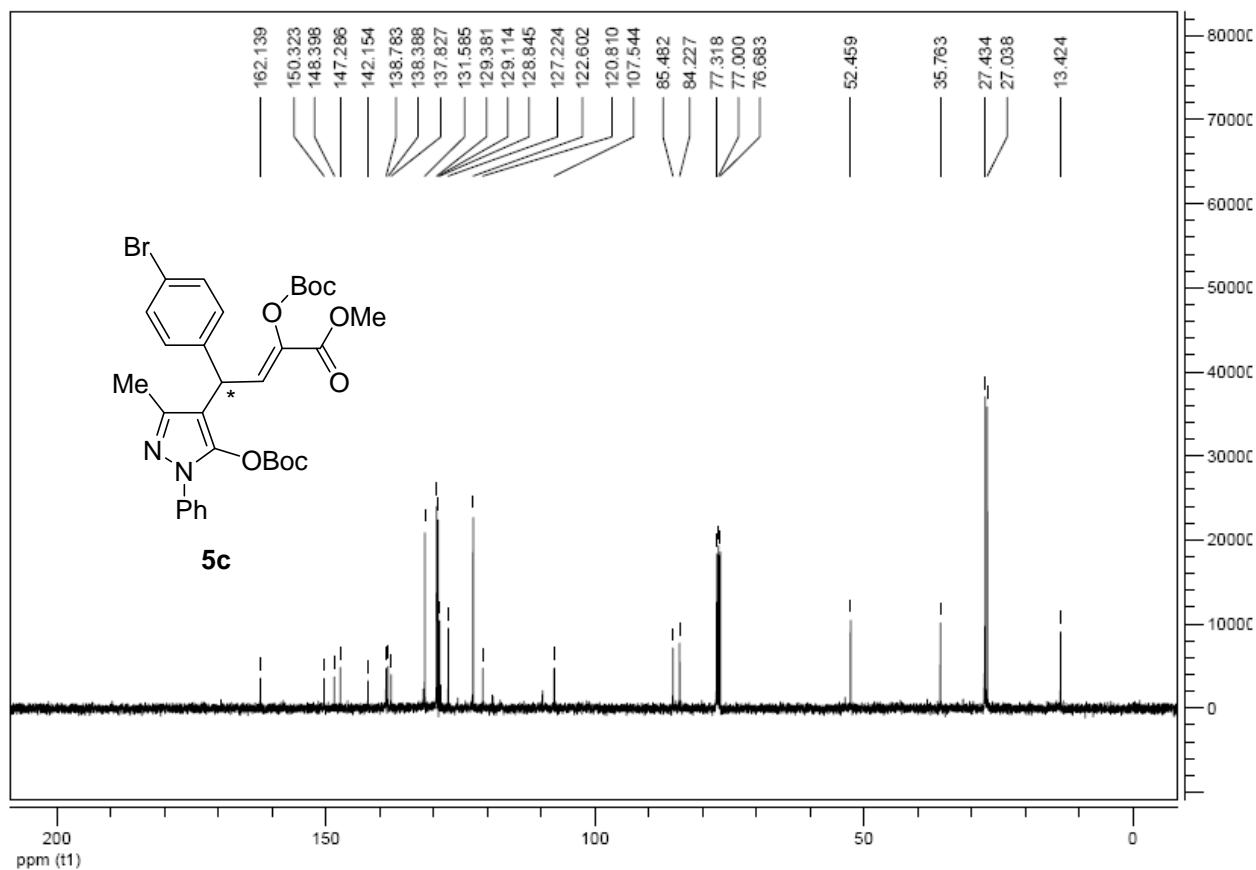

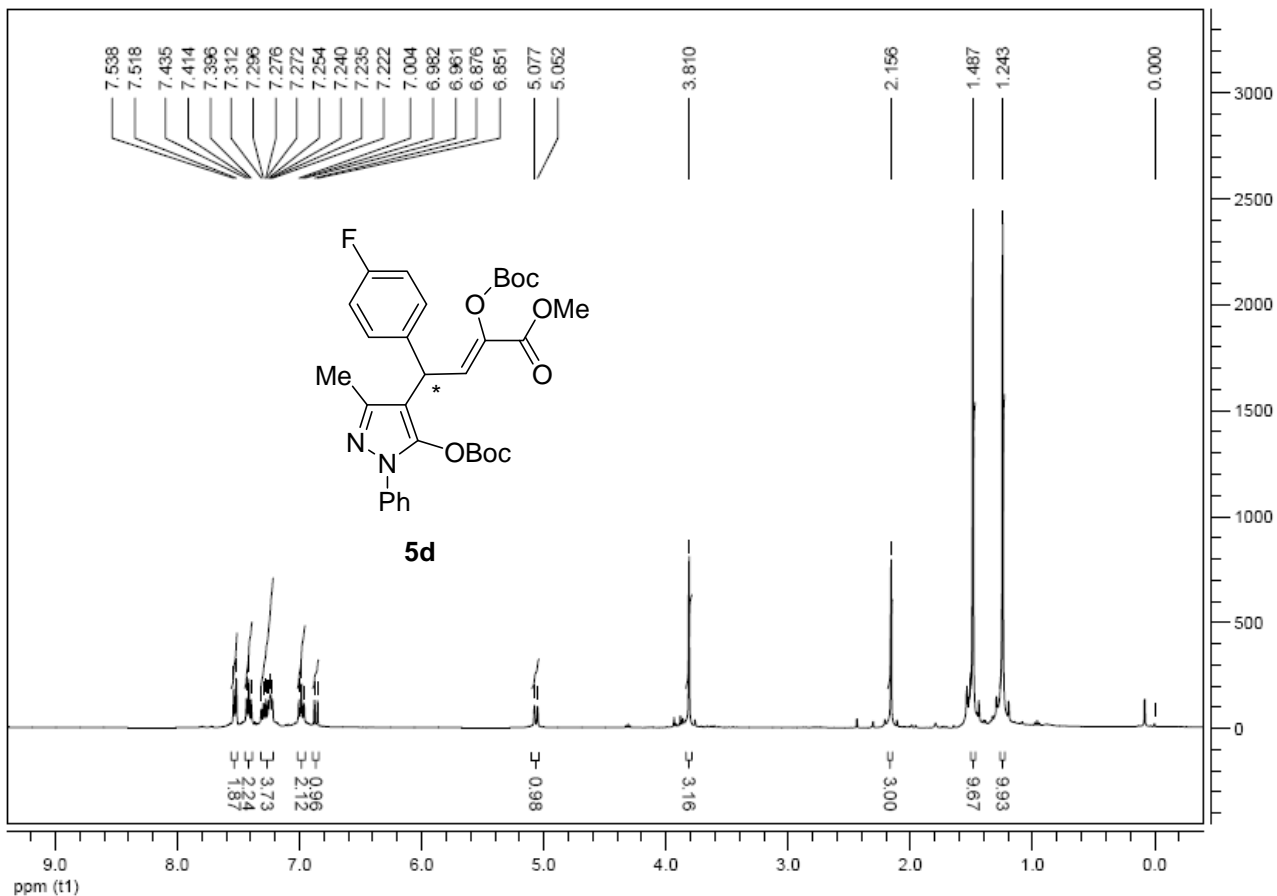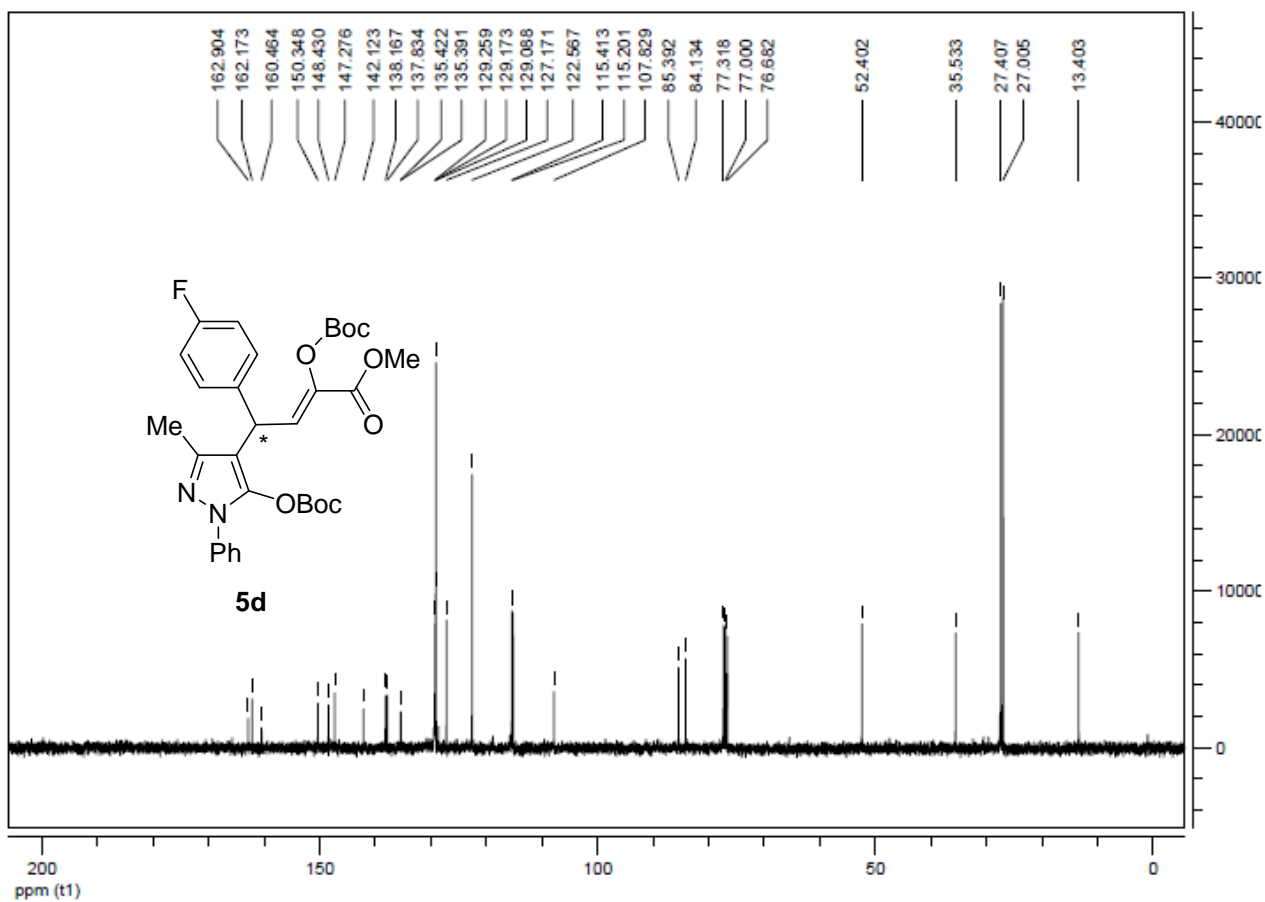

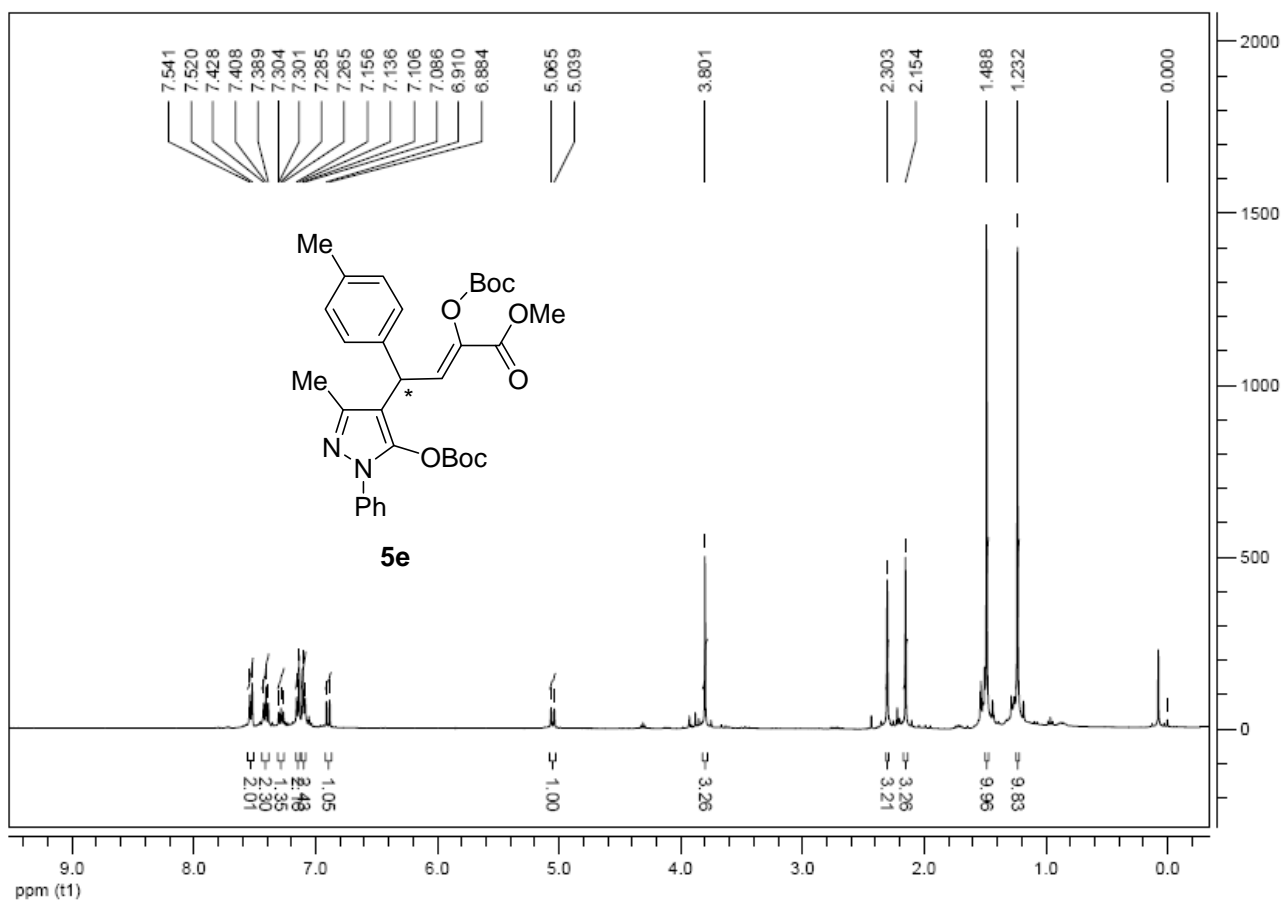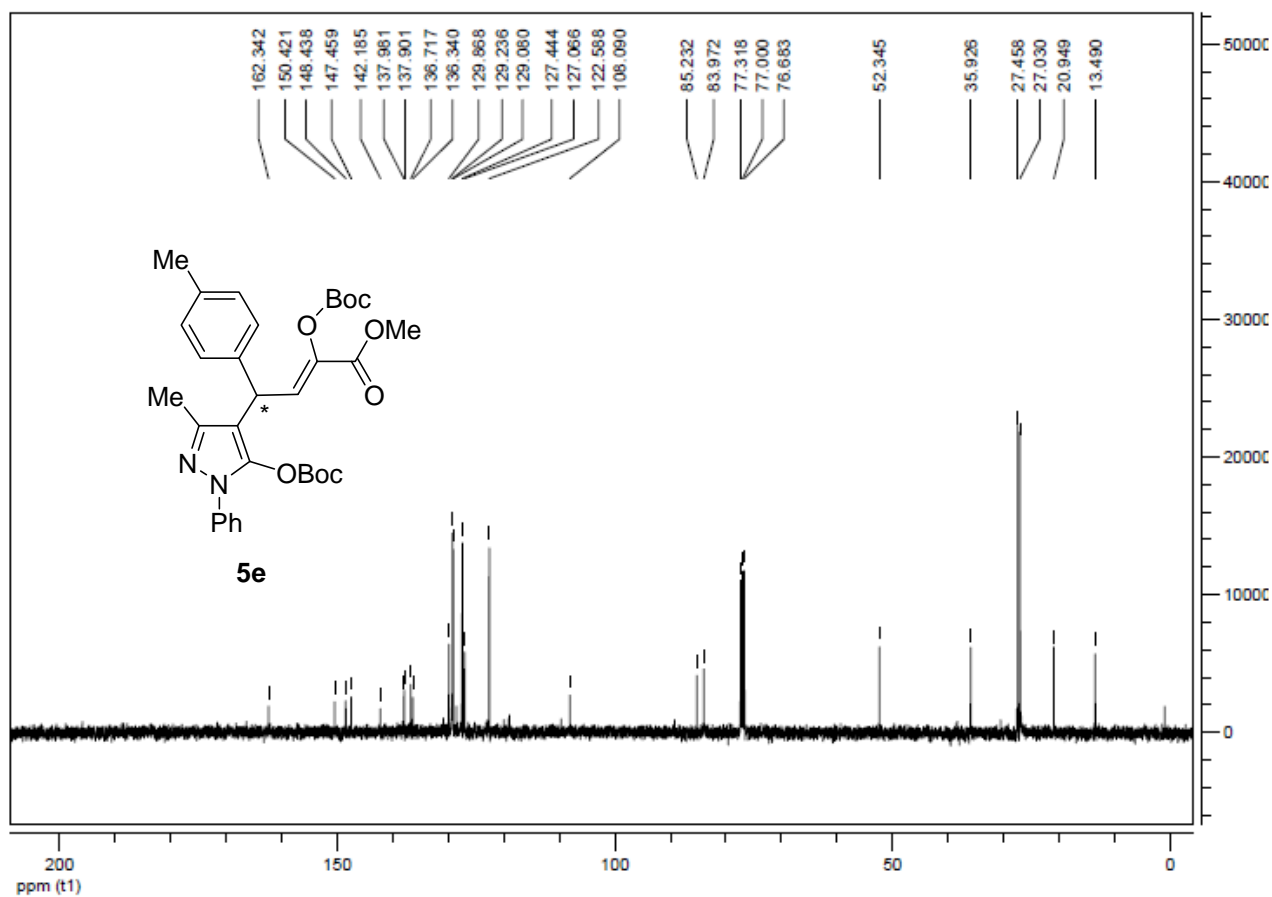

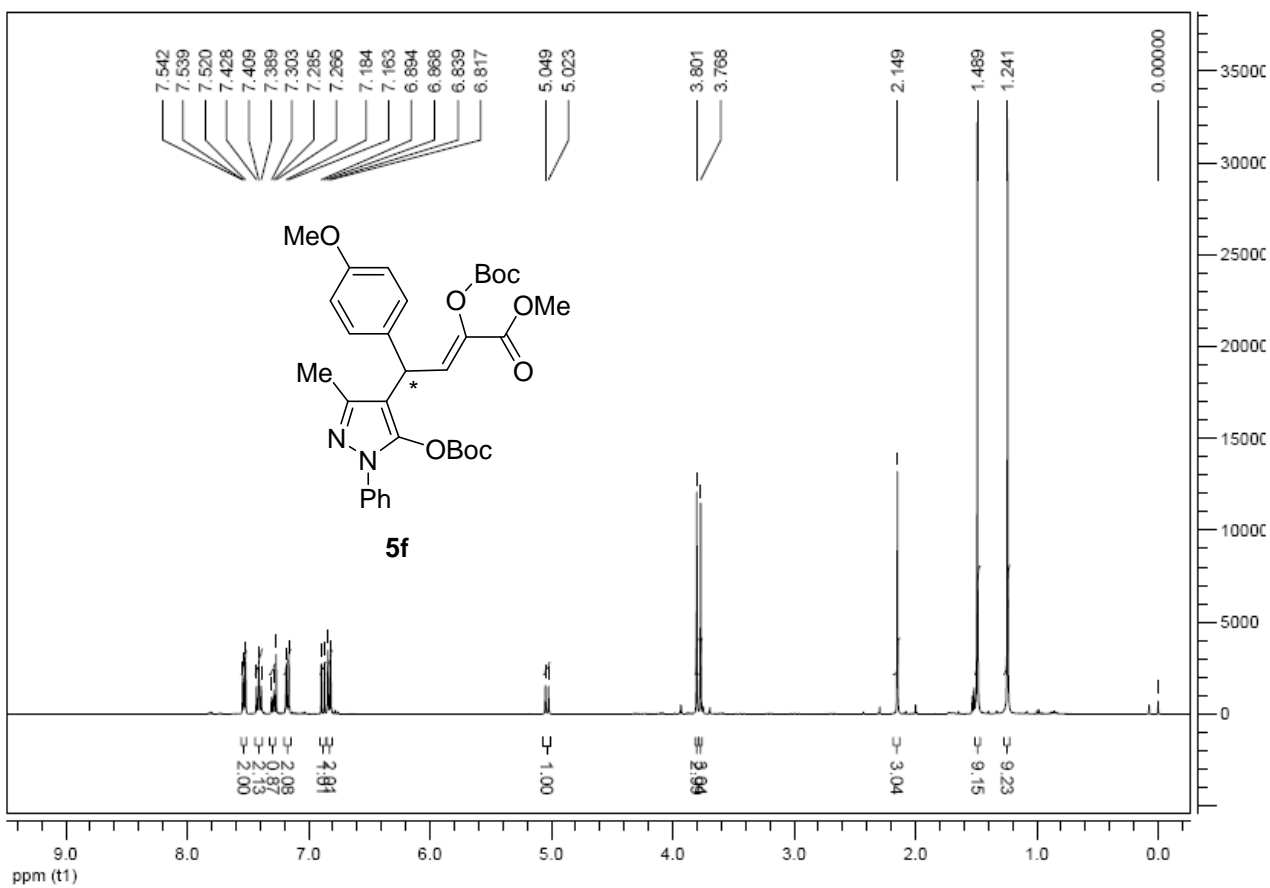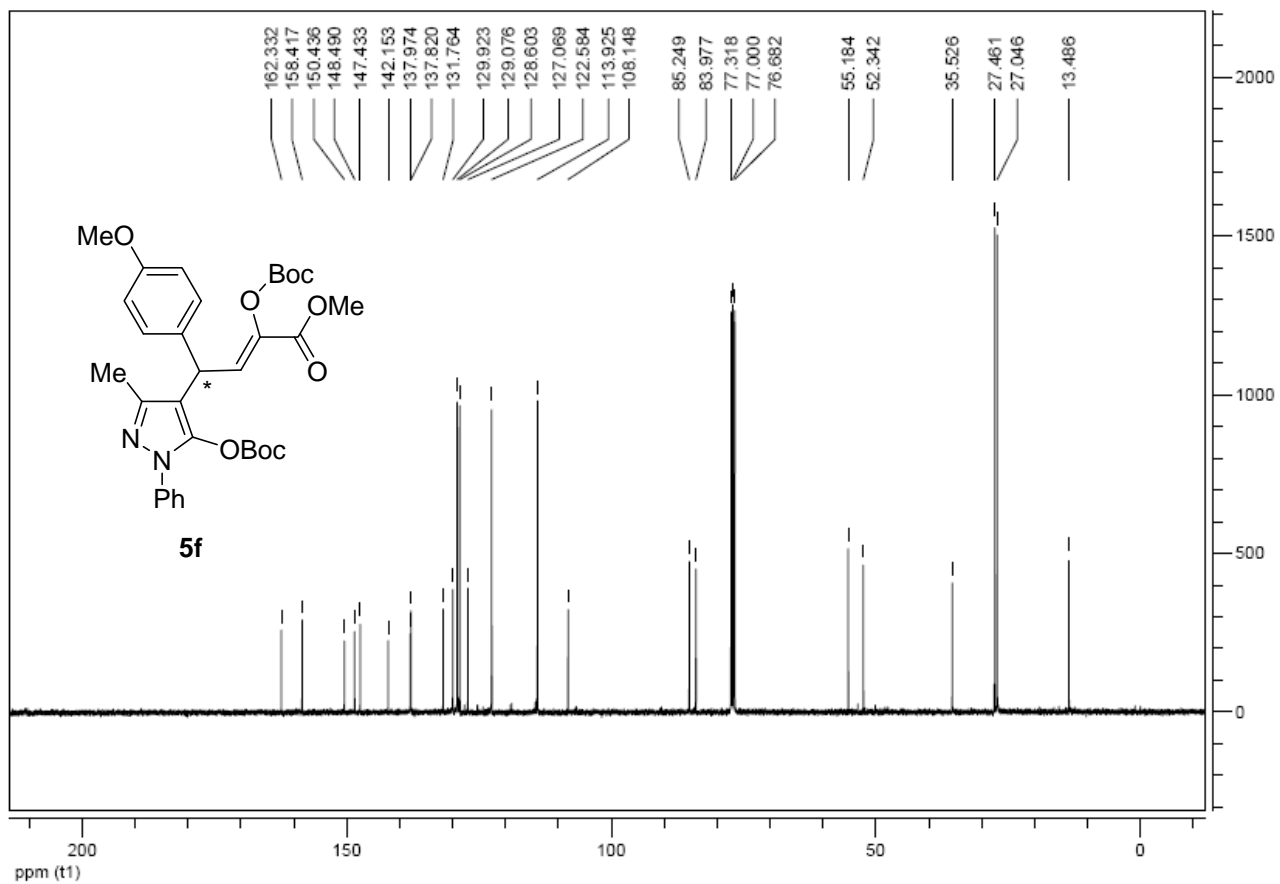



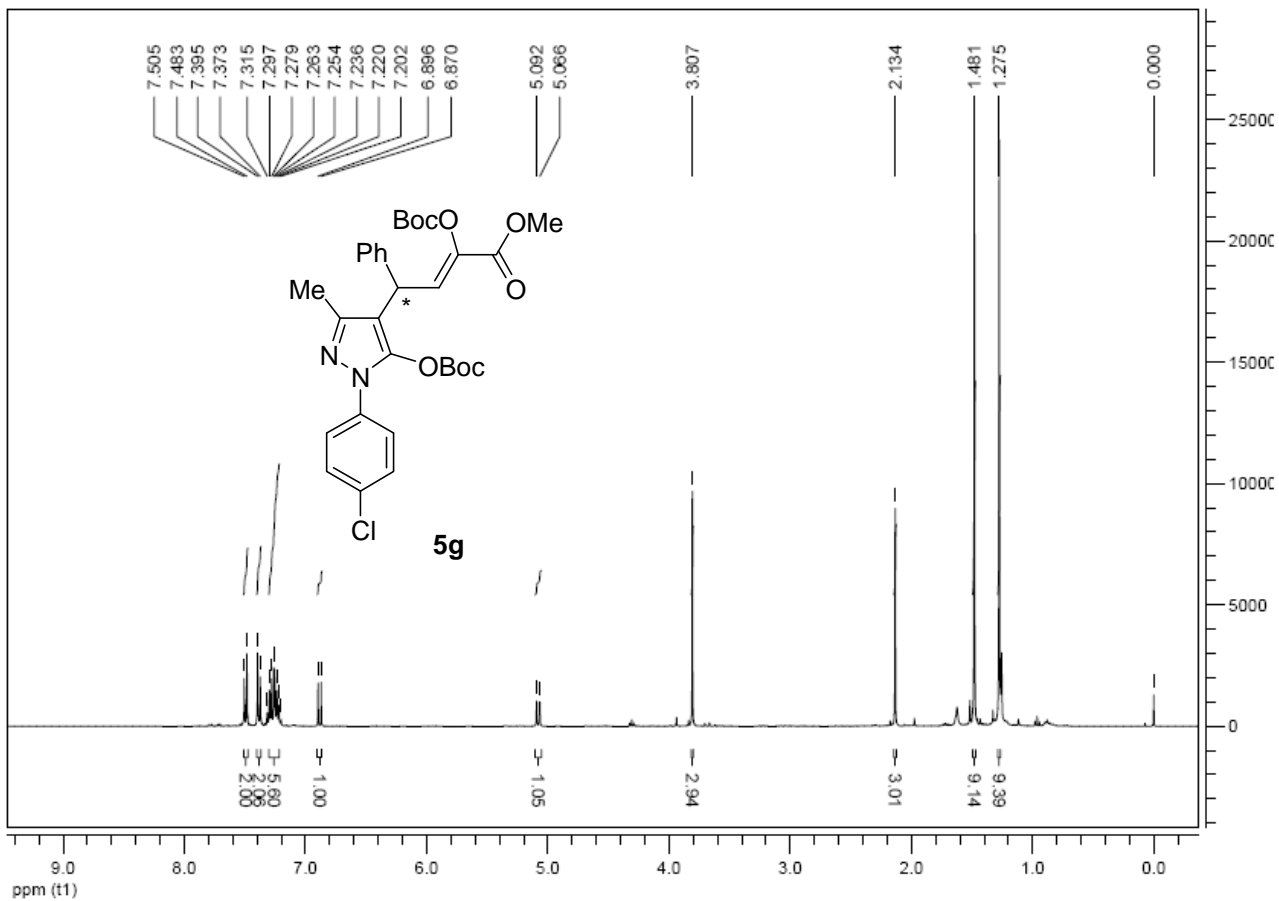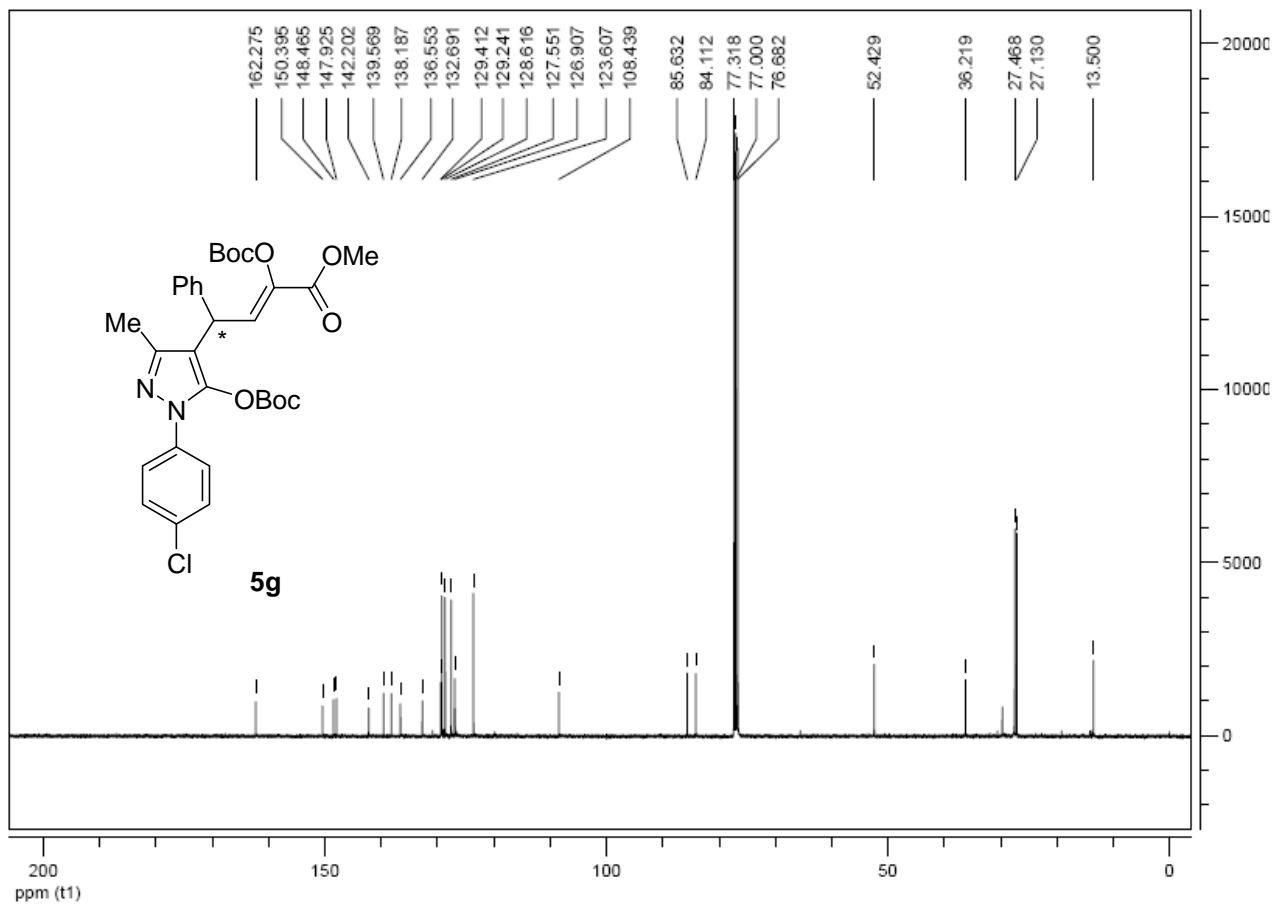

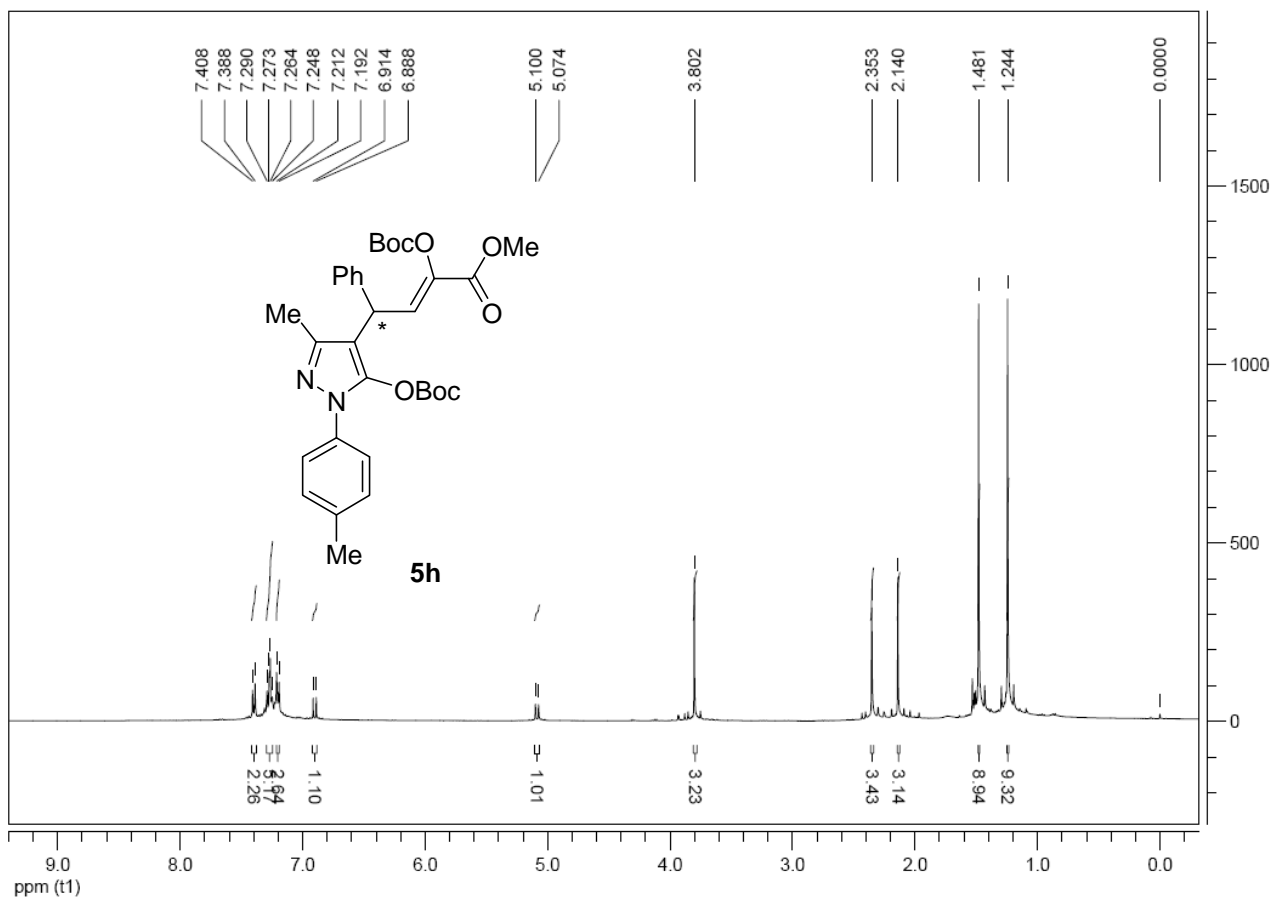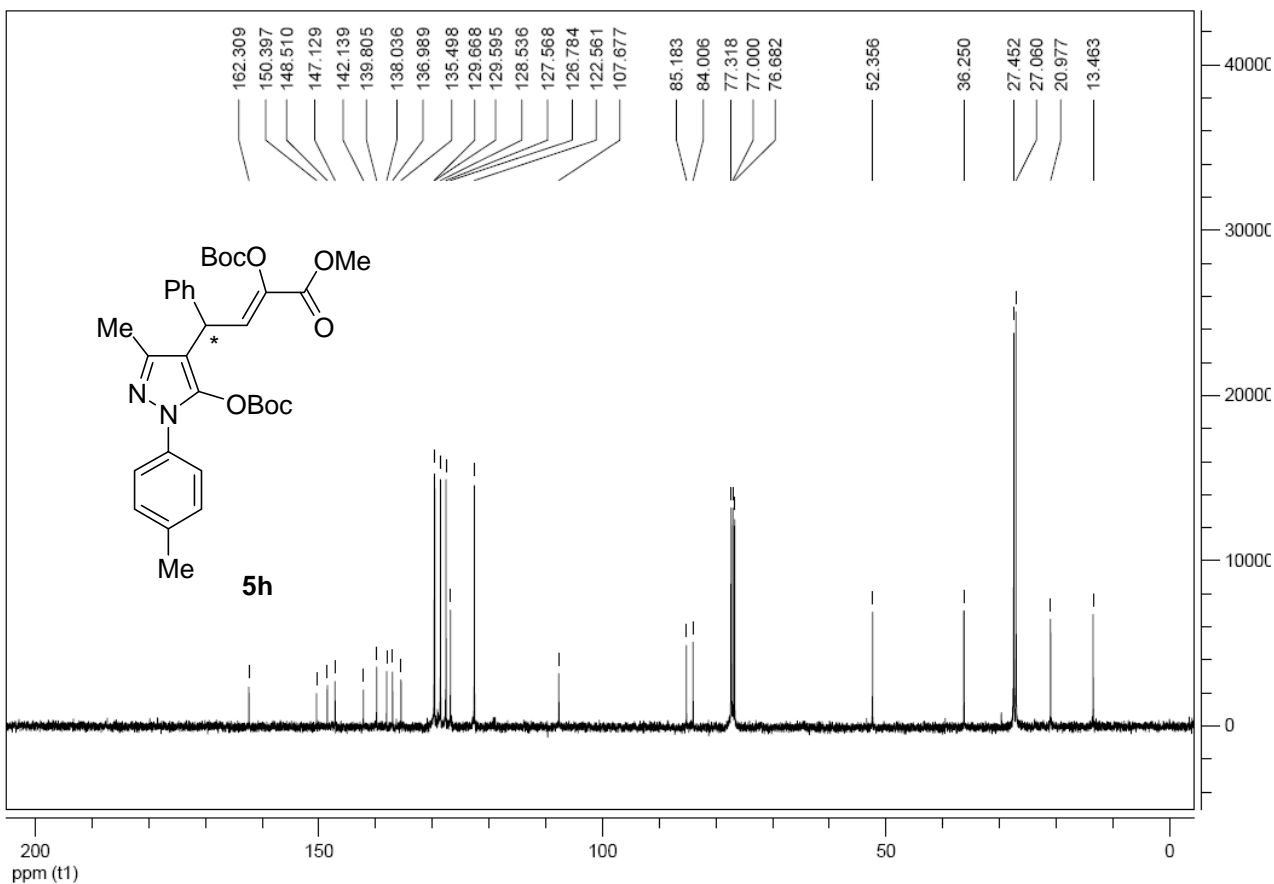

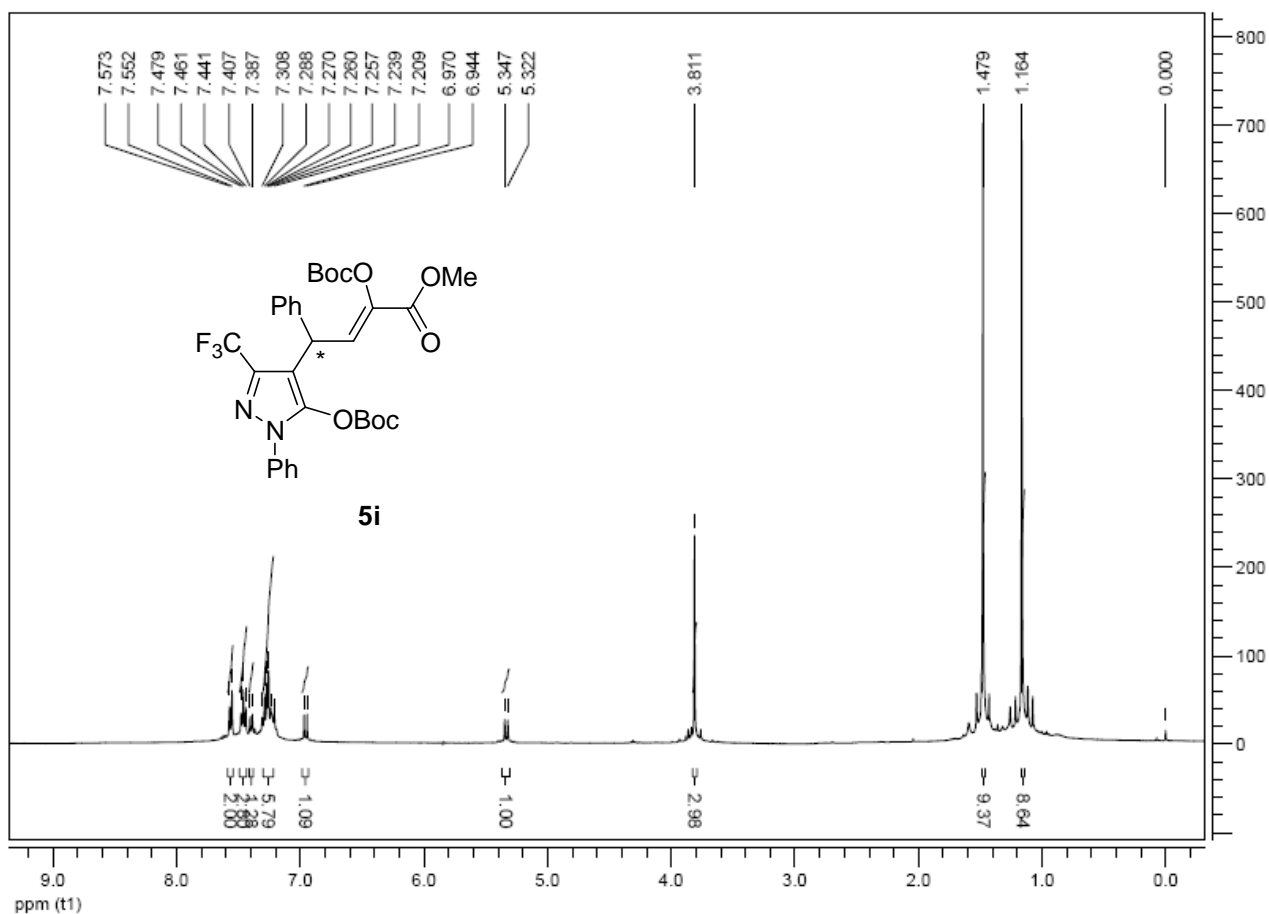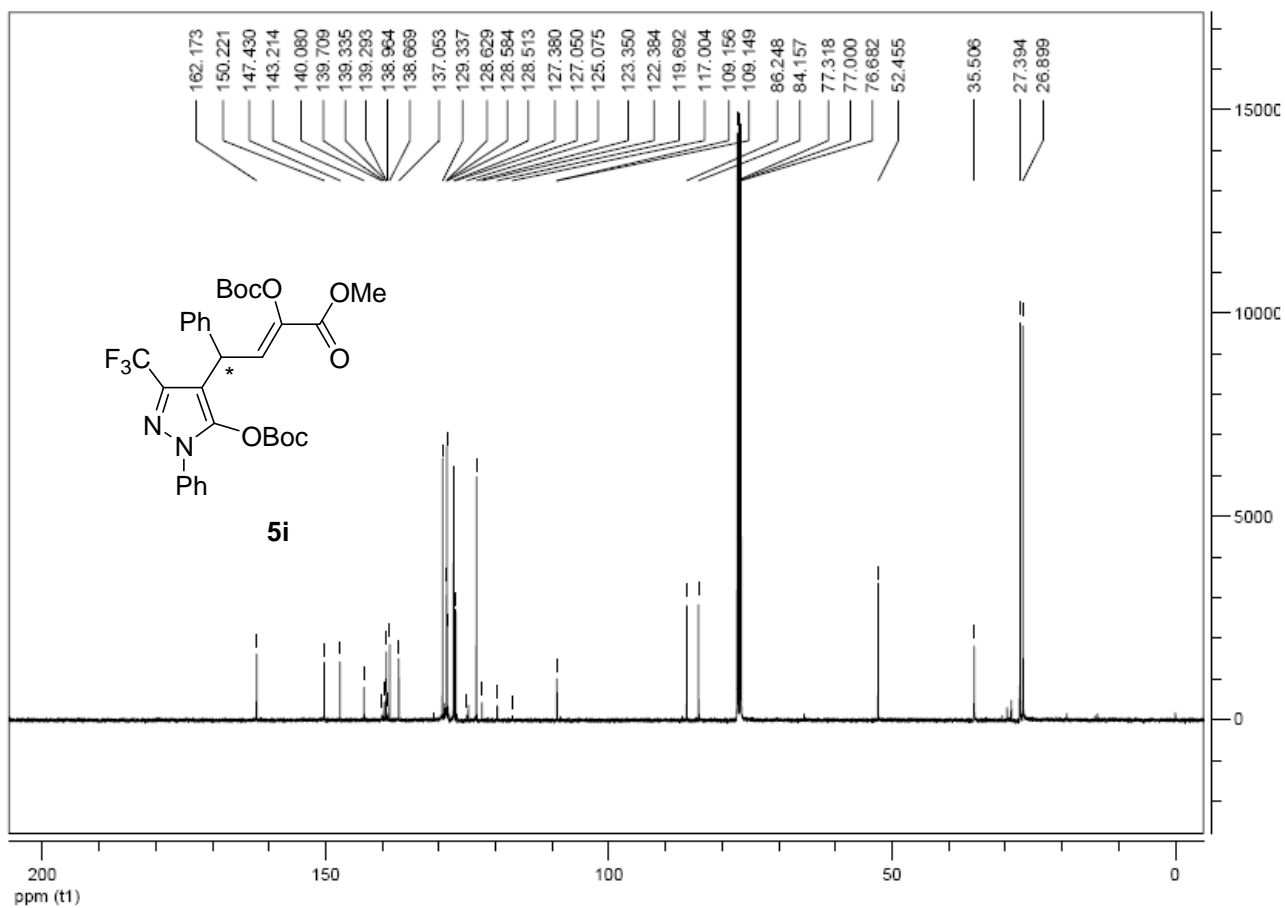

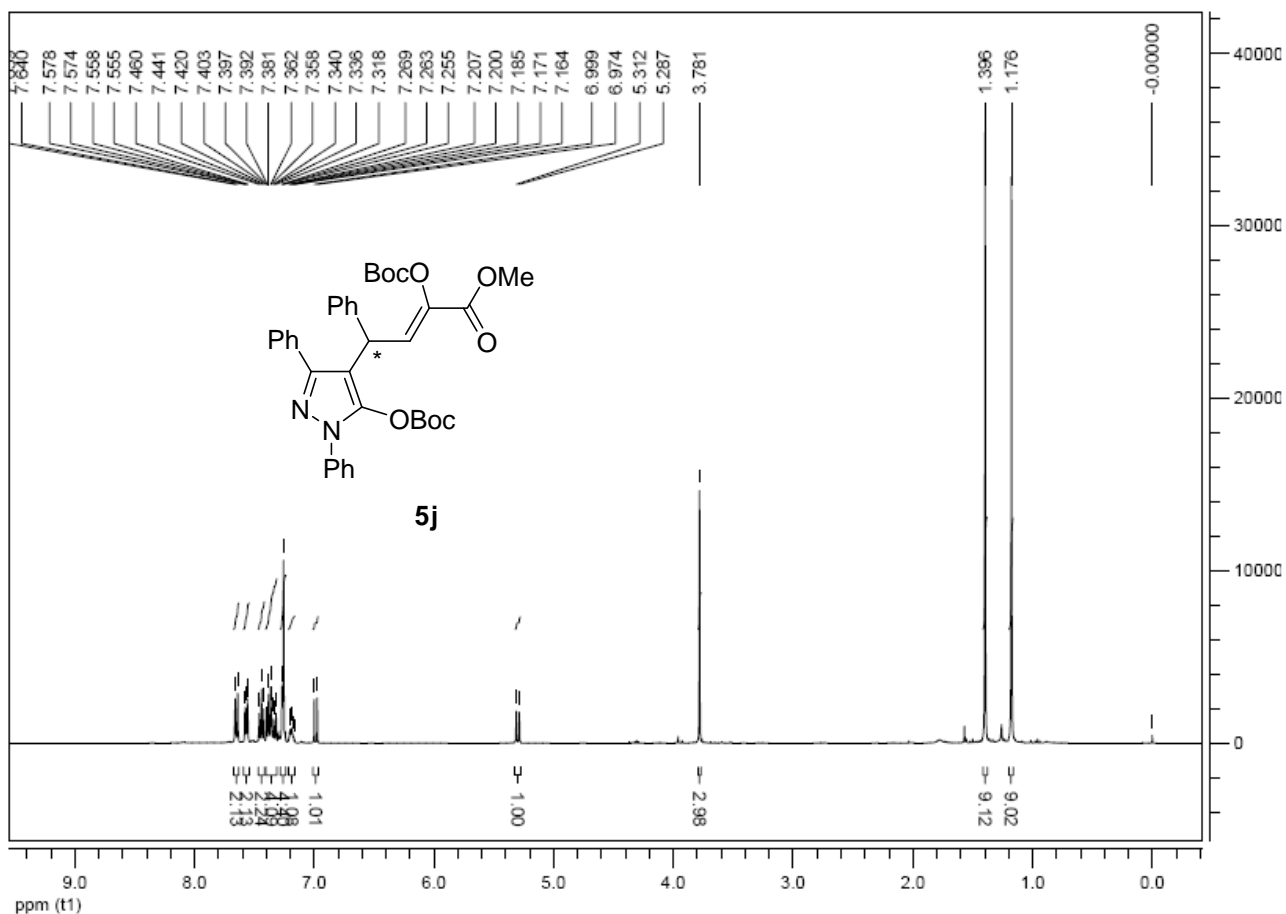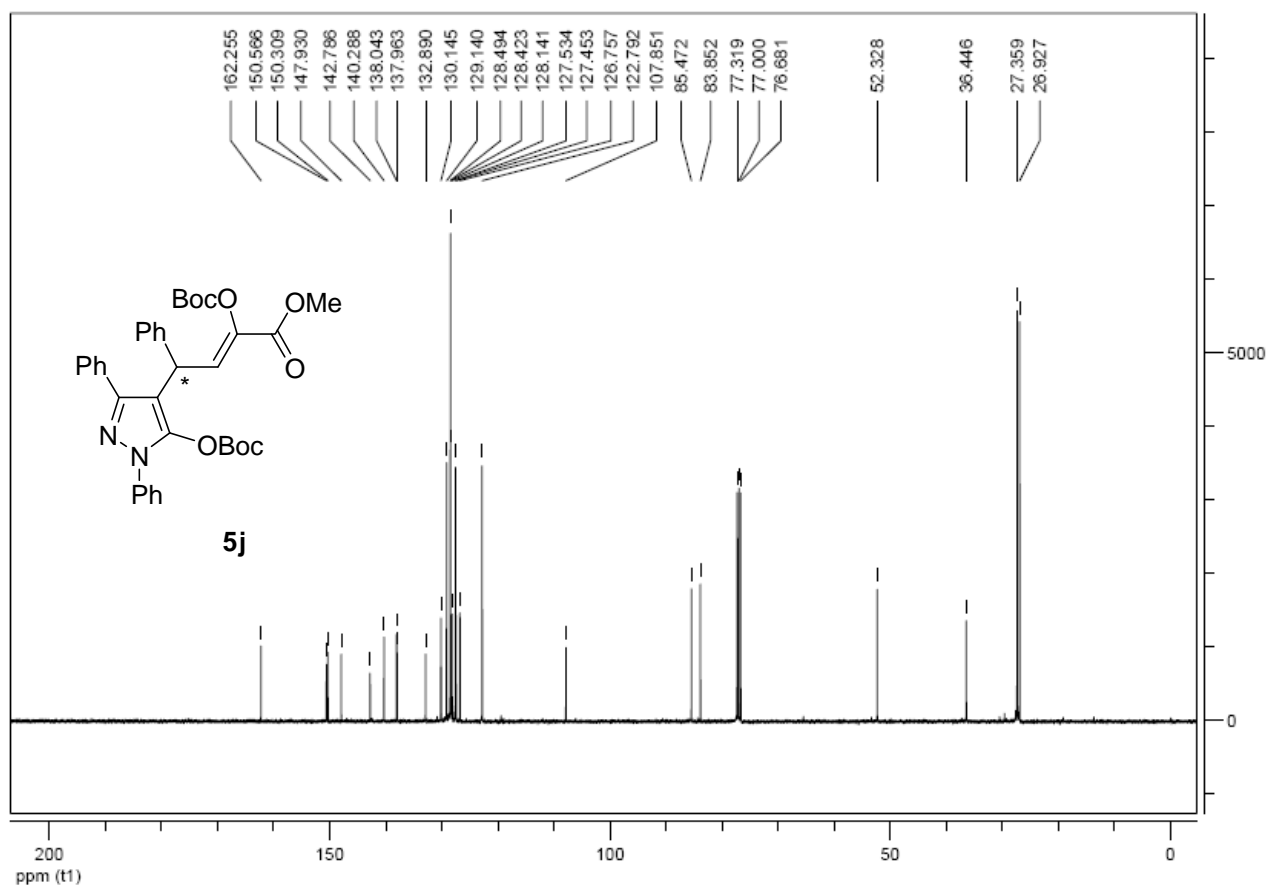

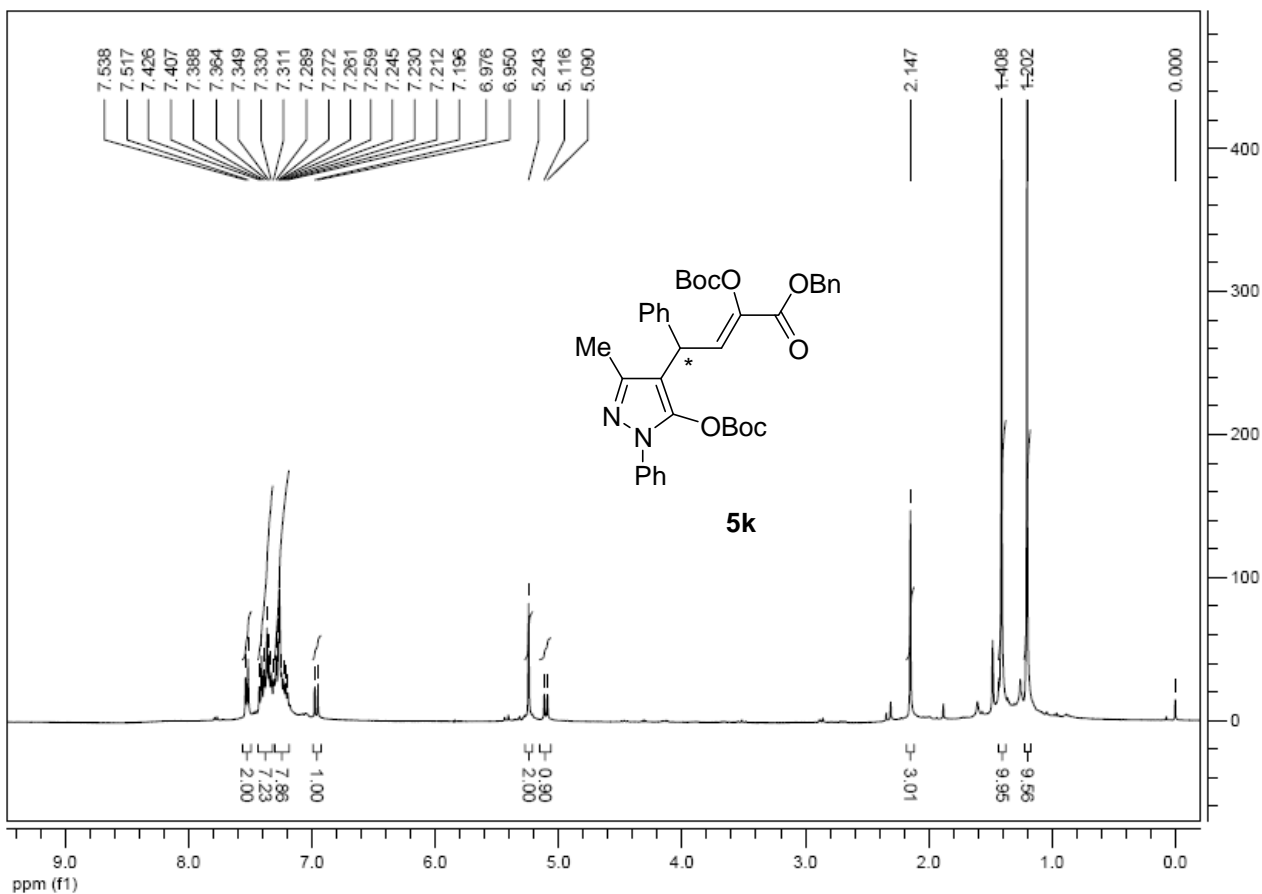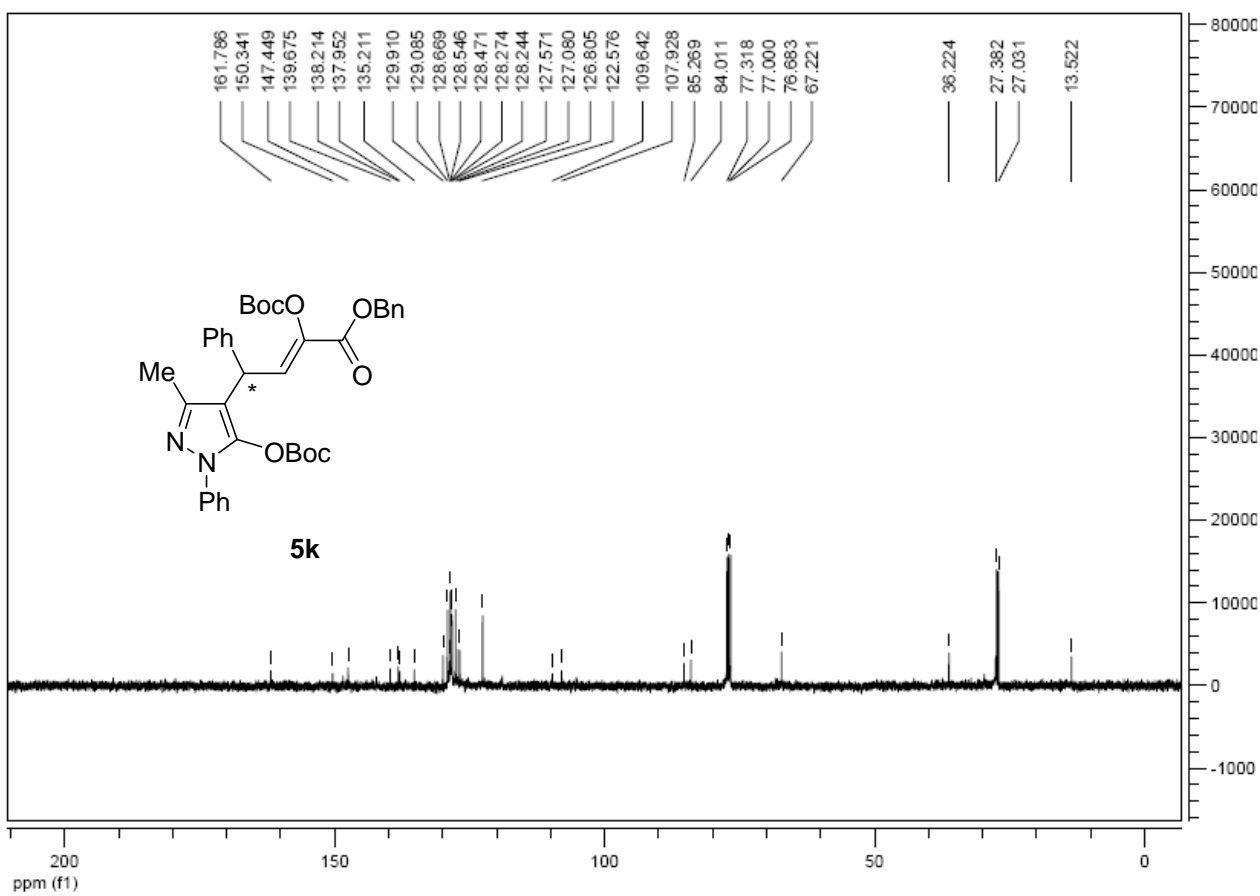

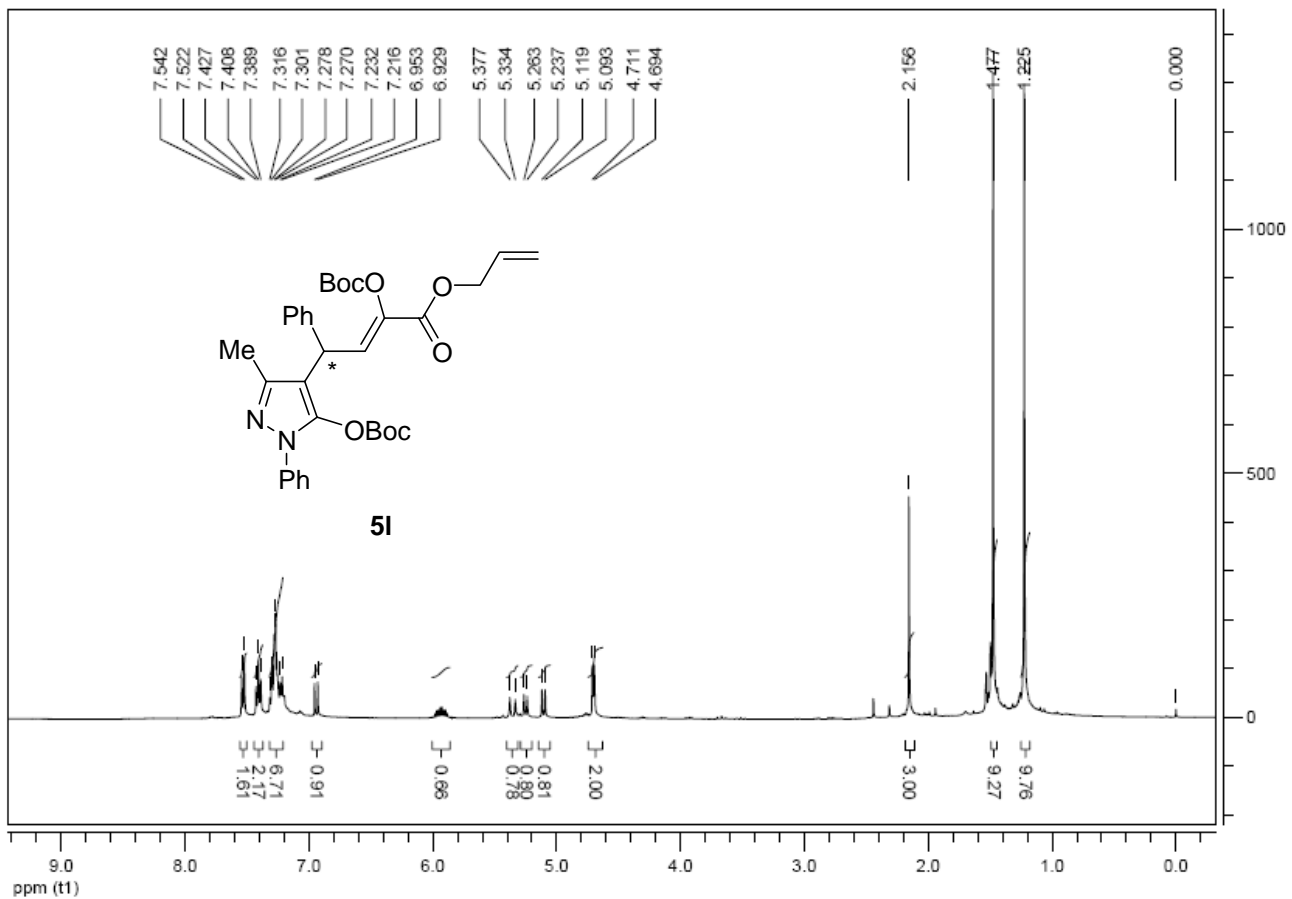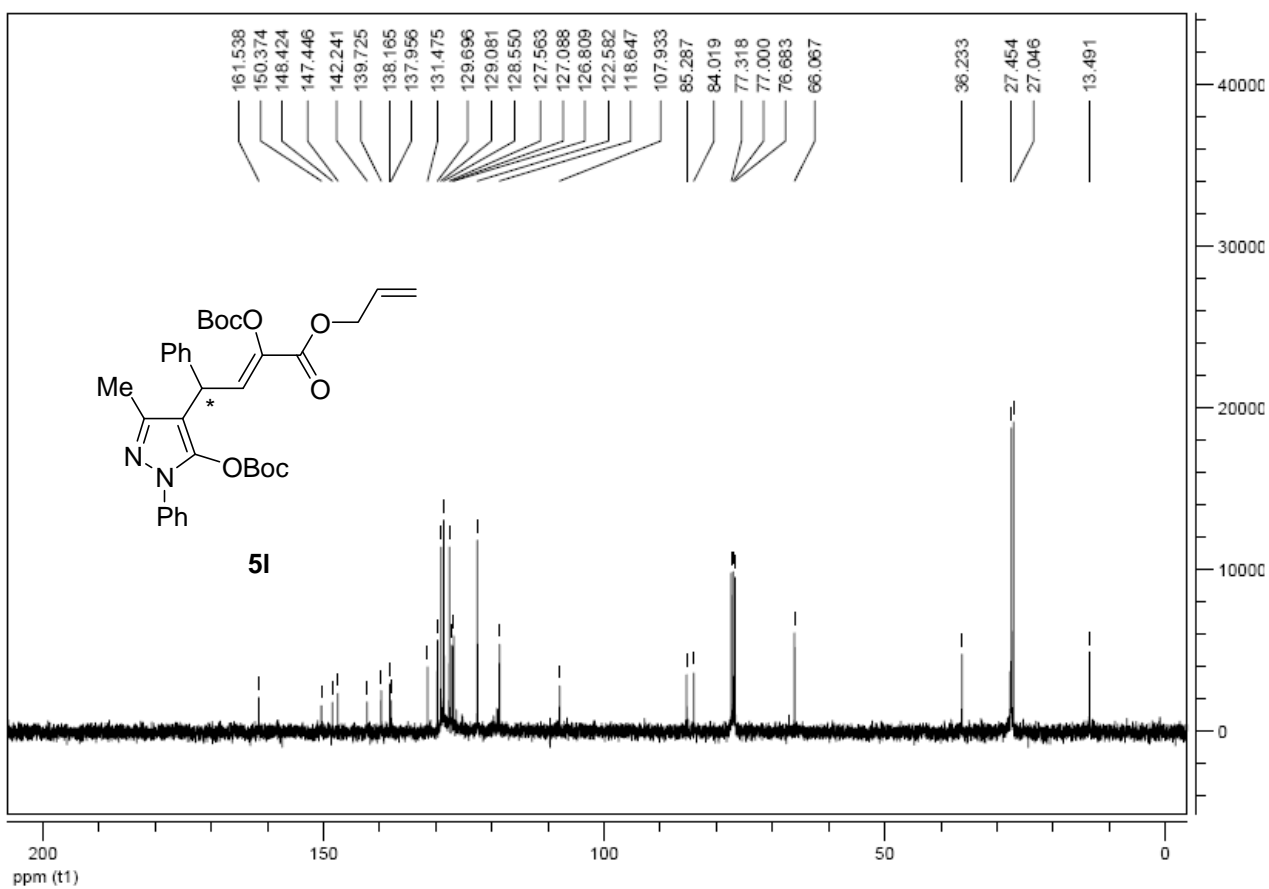

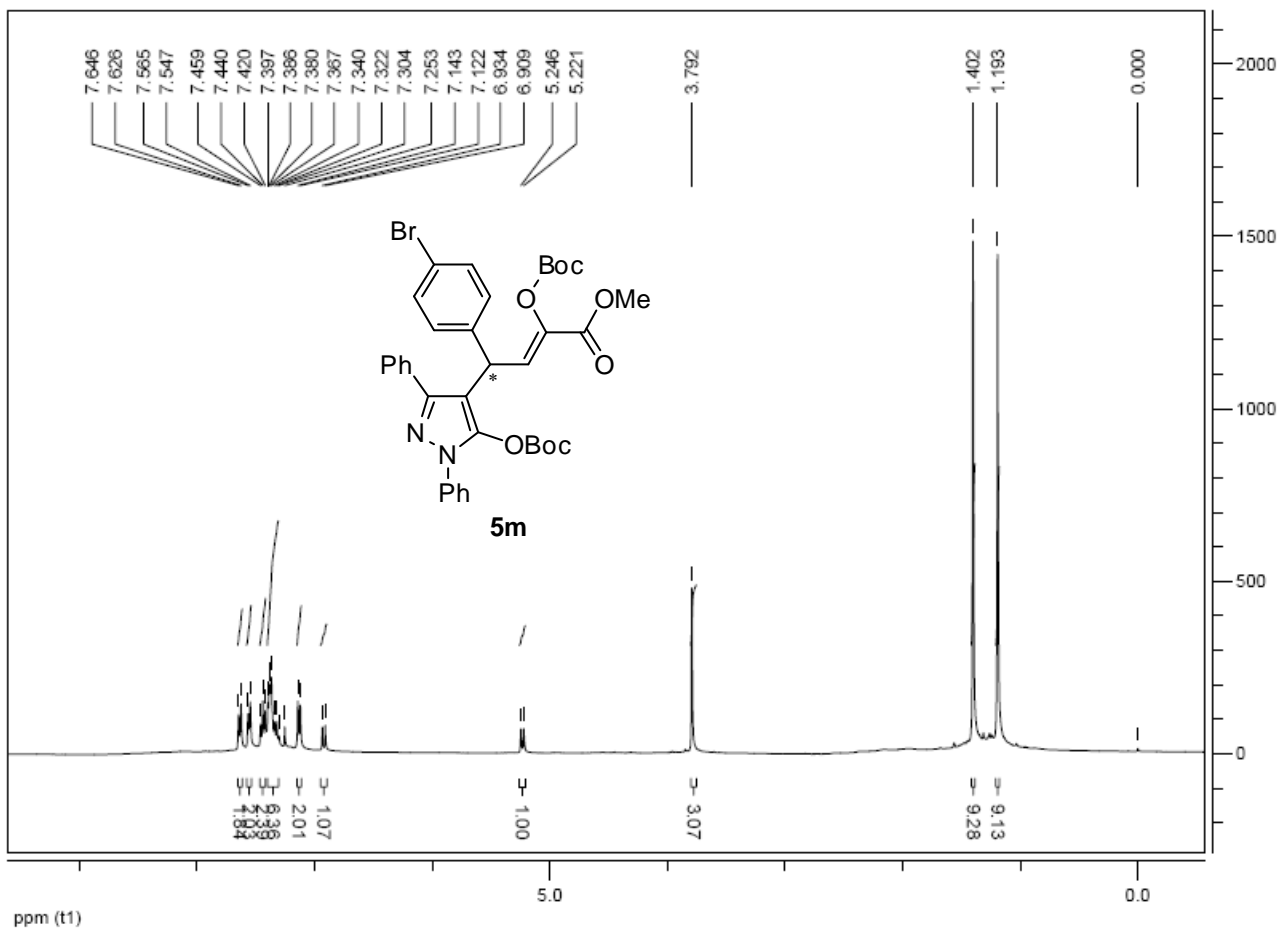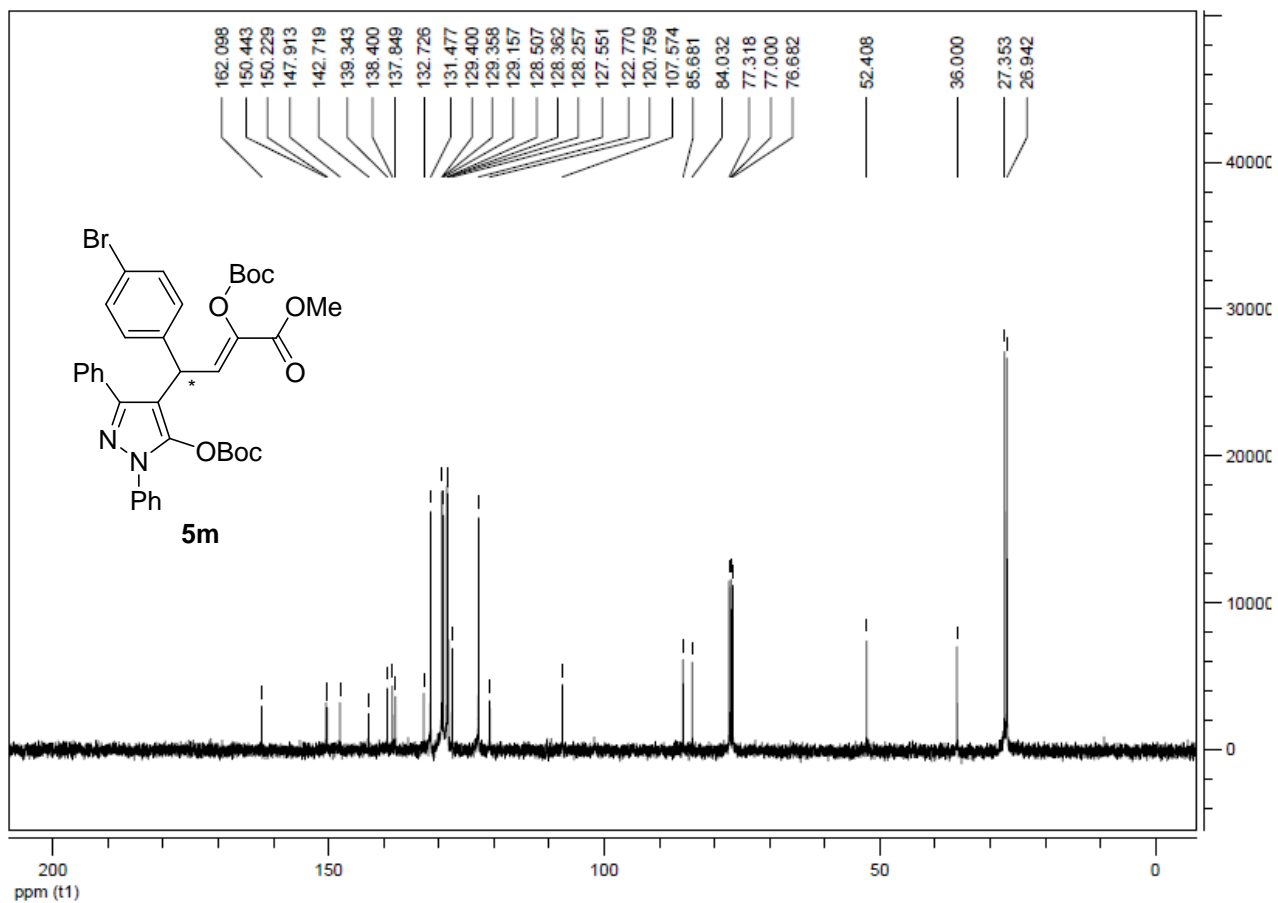

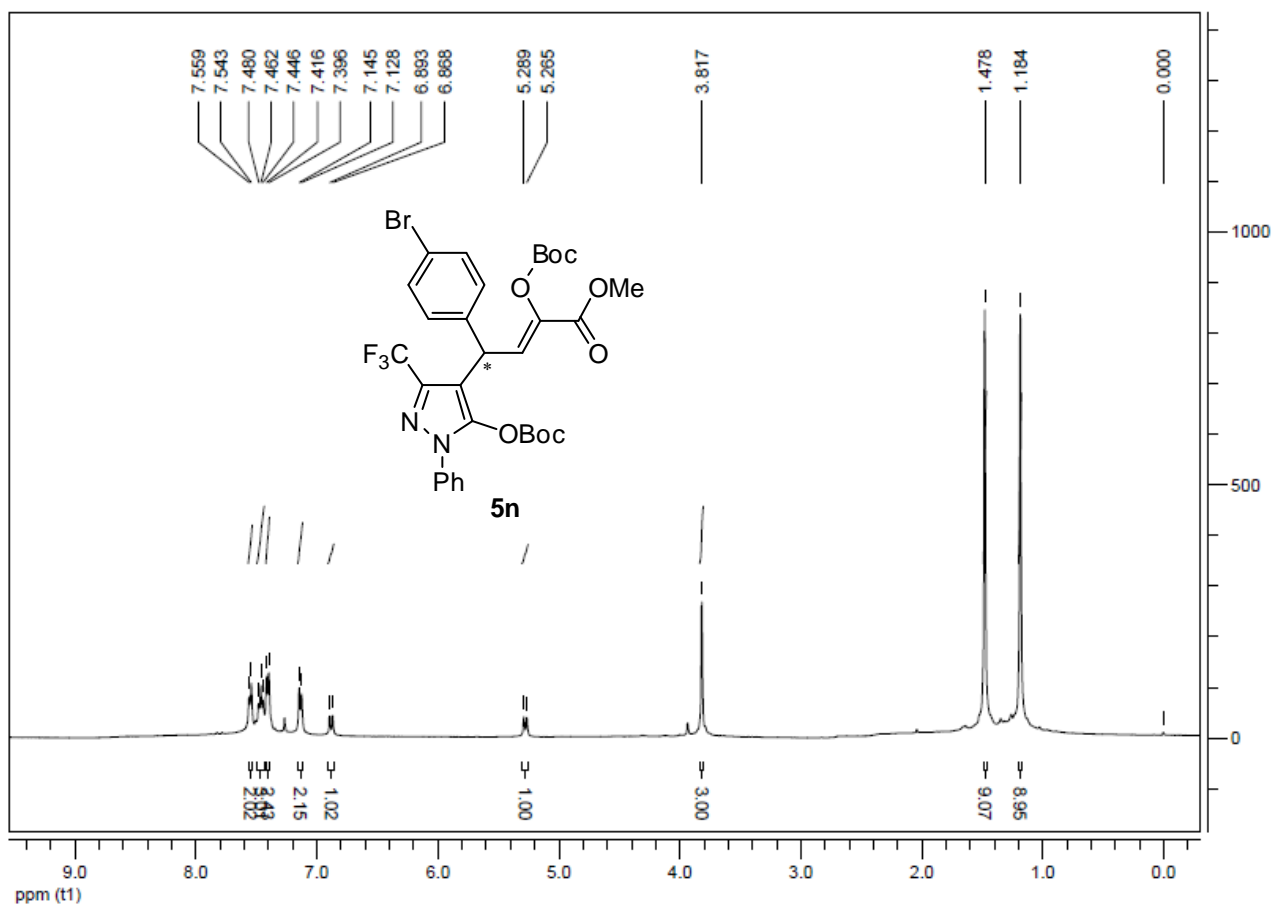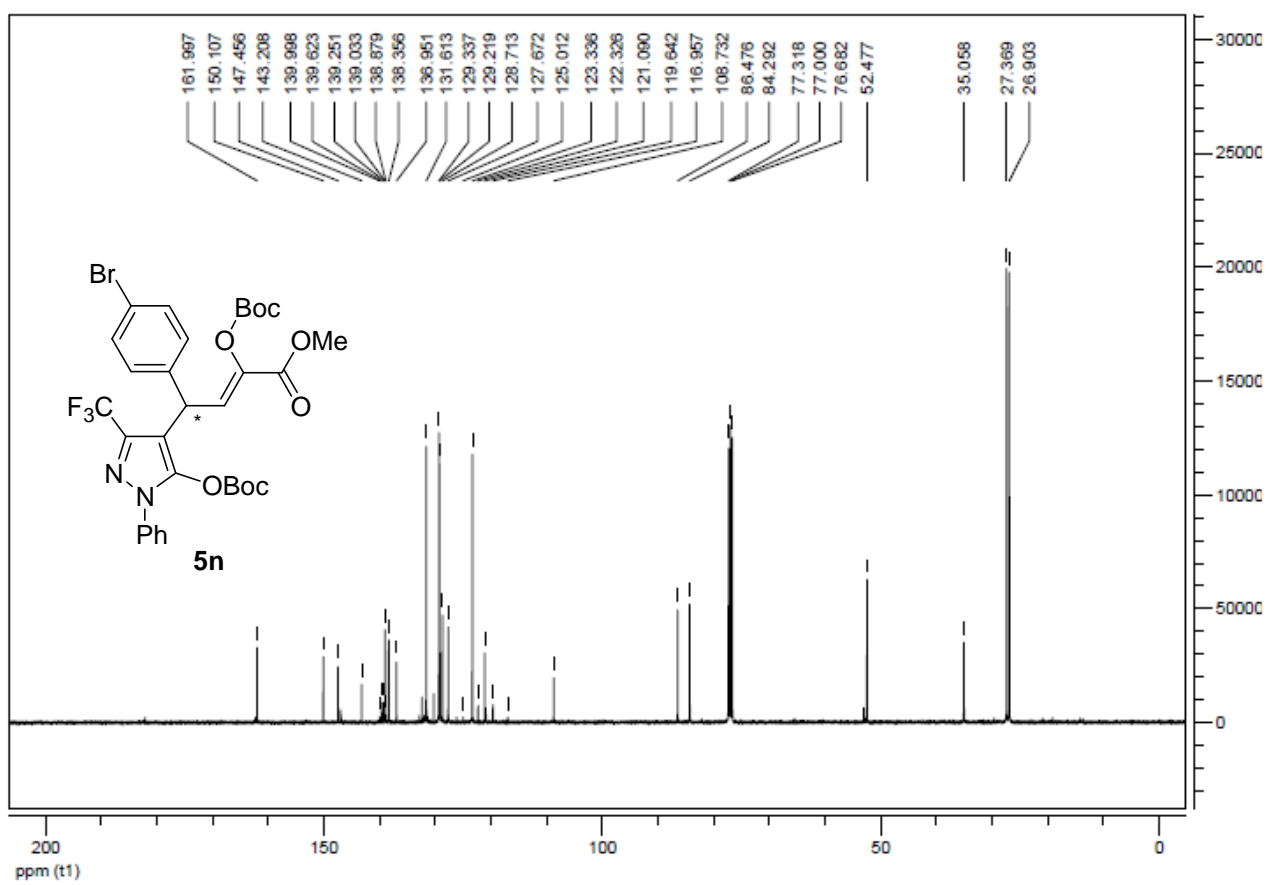



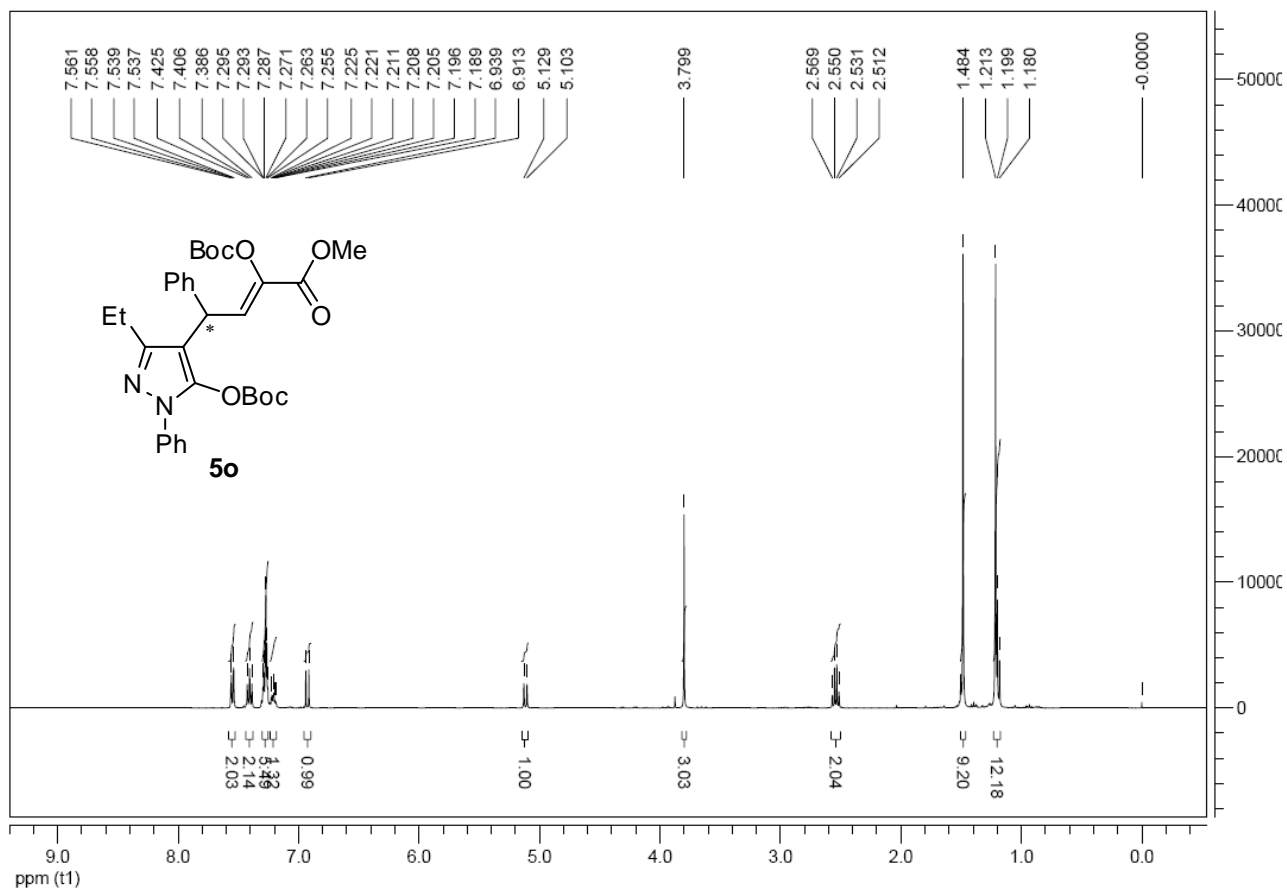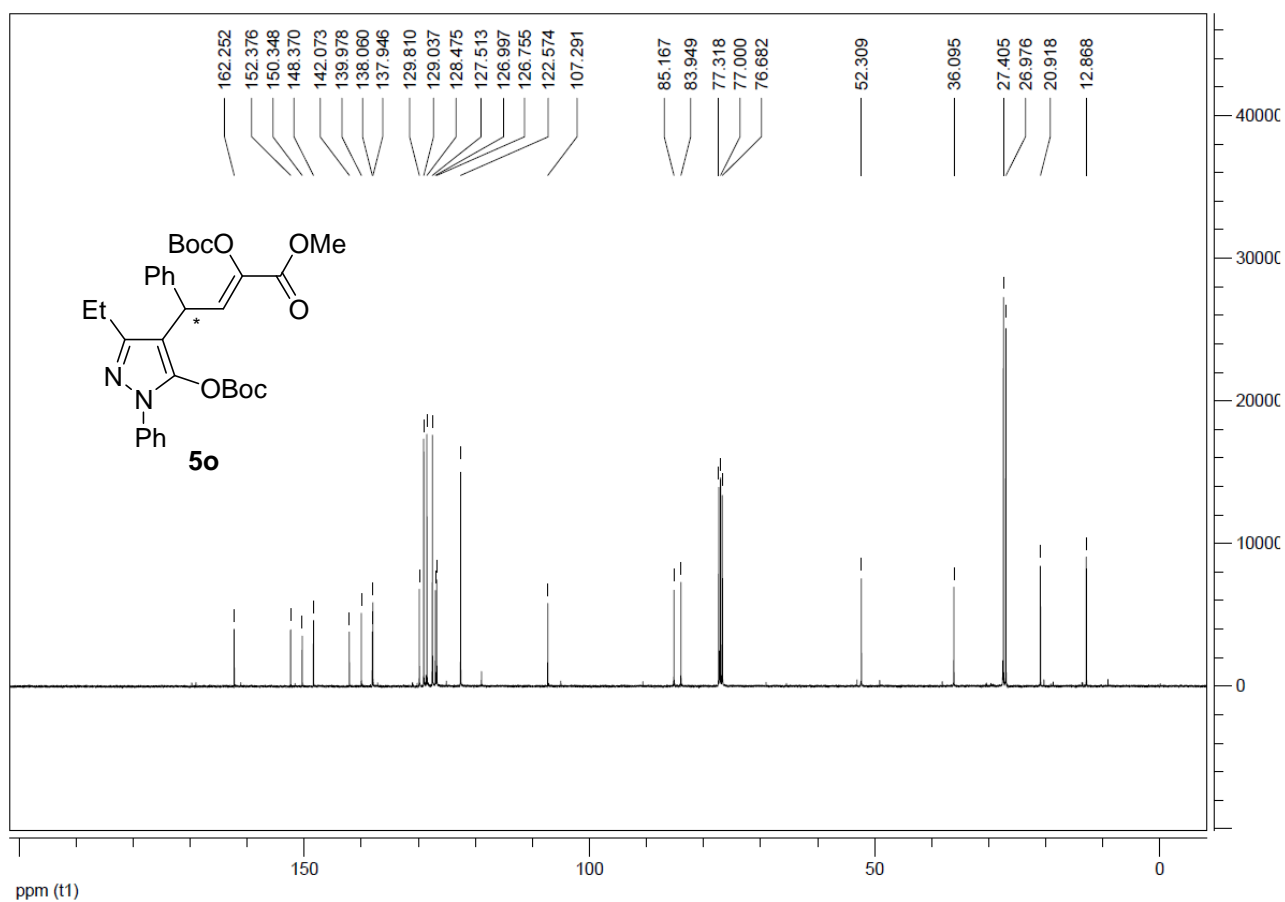

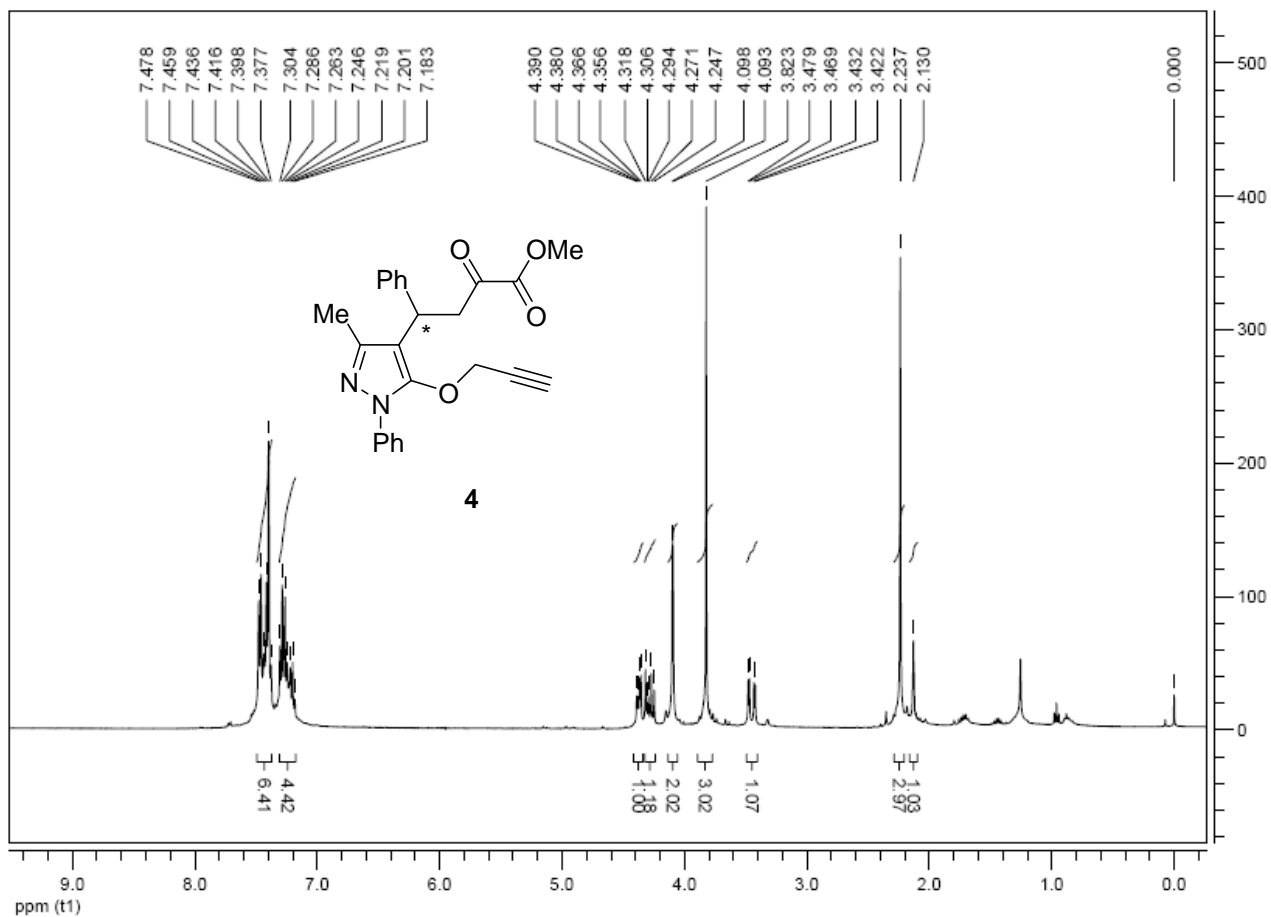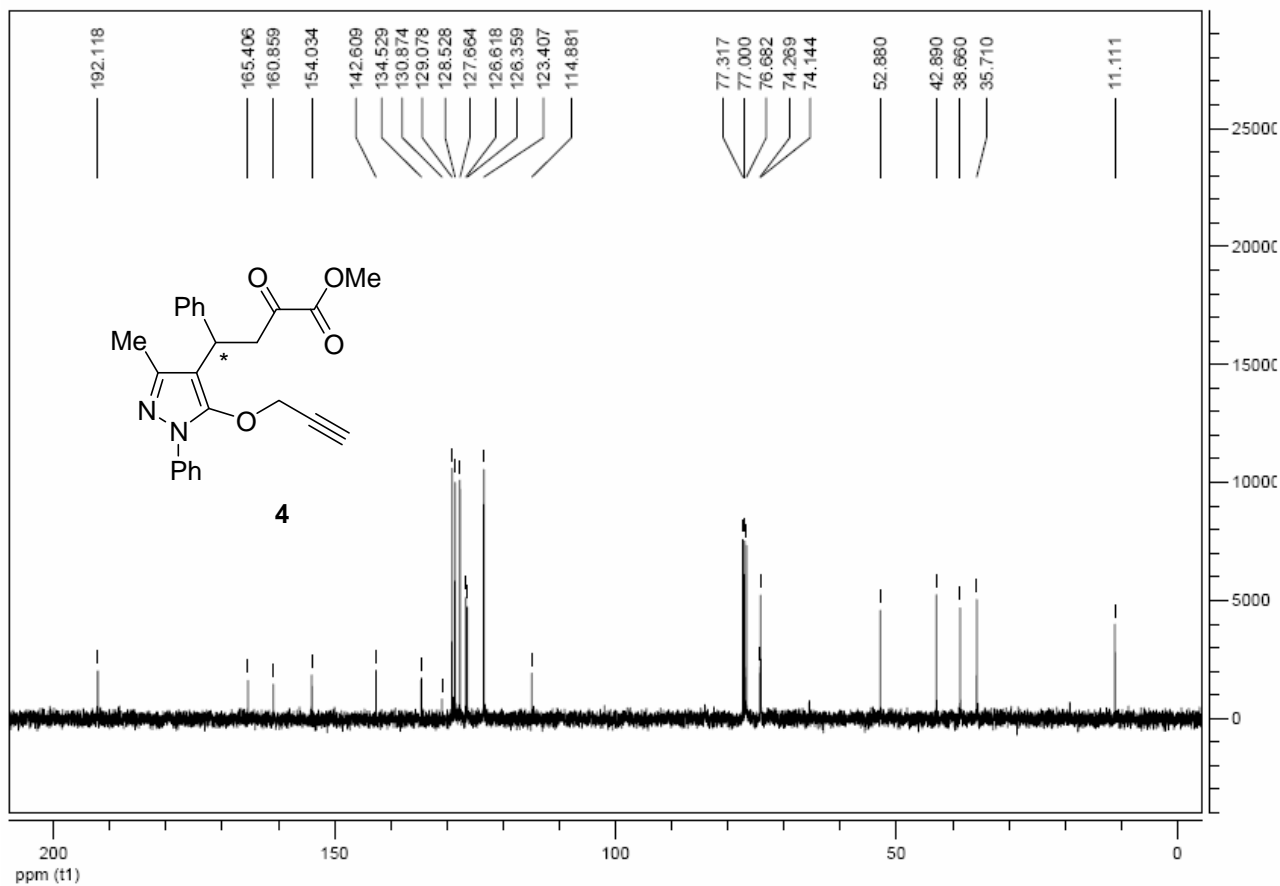

## Copies of HPLC chromatographs of products

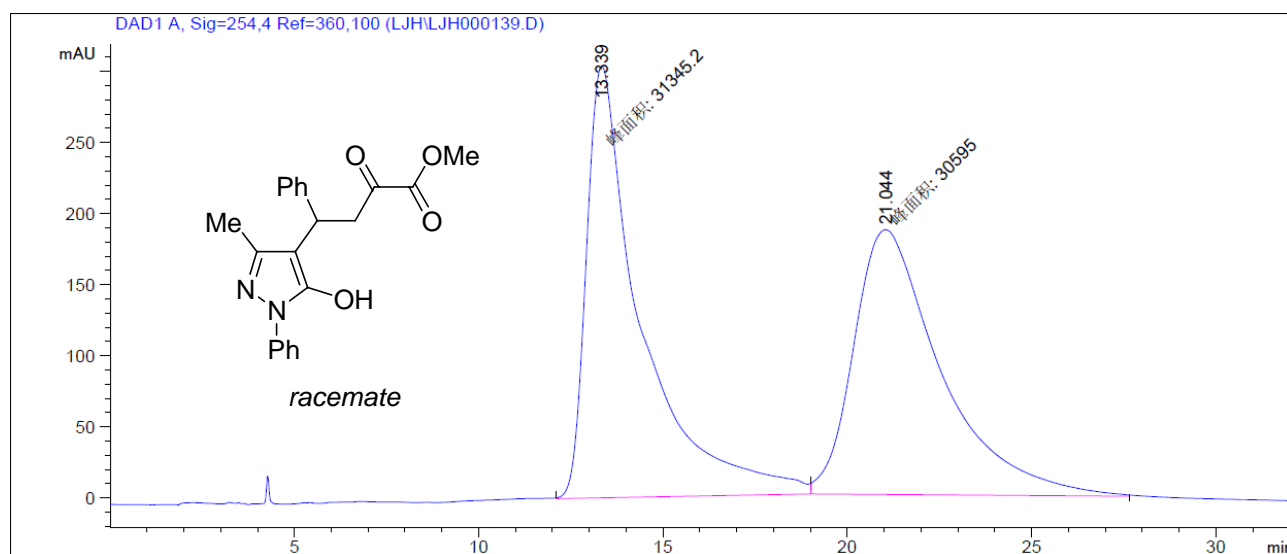

| Peak # | RetTime [min] | Type | Width [min] | Area [mAU*s] | Height [mAU] | Area %  |
|--------|---------------|------|-------------|--------------|--------------|---------|
| 1      | 13.339        | MM T | 1.7191      | 3.13452e4    | 303.89203    | 50.6056 |
| 2      | 21.044        | MM T | 2.7379      | 3.05950e4    | 186.24126    | 49.3944 |

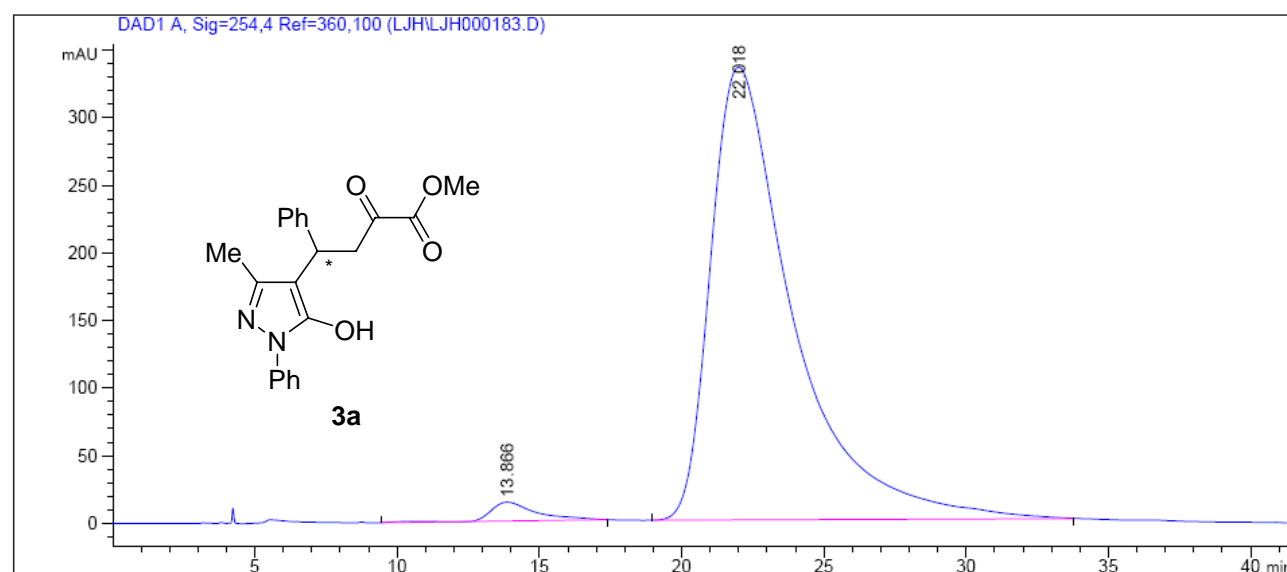

| Peak # | RetTime [min] | Type | Width [min] | Area [mAU*s] | Height [mAU] | Area %  |
|--------|---------------|------|-------------|--------------|--------------|---------|
| 1      | 13.866        | BB S | 1.6328      | 1556.57520   | 13.96080     | 2.2498  |
| 2      | 22.018        | BB   | 2.9284      | 6.76294e4    | 334.83258    | 97.7502 |

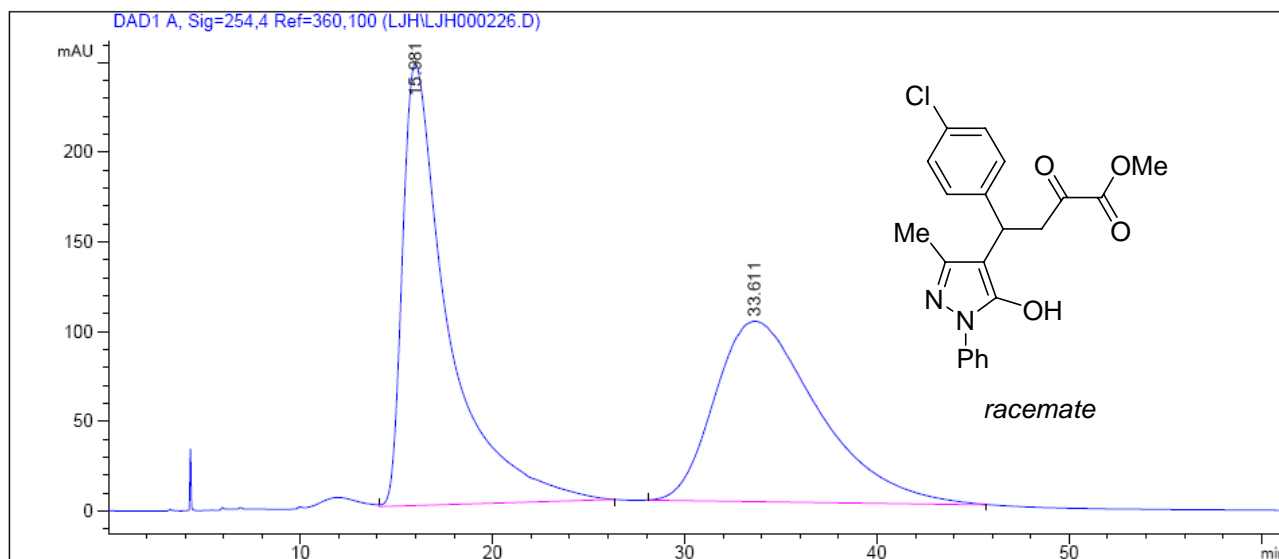

| Peak # | RetTime [min] | Type | Width [min] | Area [mAU*s] | Height [mAU] | Area %  |
|--------|---------------|------|-------------|--------------|--------------|---------|
| 1      | 15.981        | VB S | 2.3586      | 4.06390e4    | 246.60786    | 51.8135 |
| 2      | 33.611        | BB   | 4.5144      | 3.77943e4    | 100.70744    | 48.1865 |

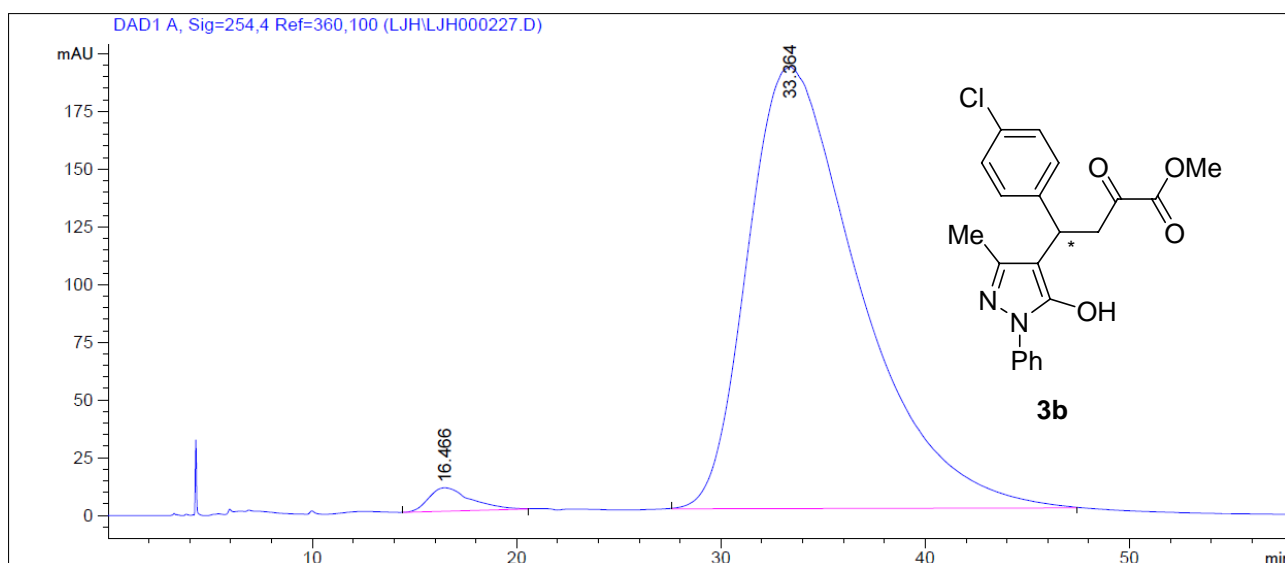

| Peak # | RetTime [min] | Type | Width [min] | Area [mAU*s] | Height [mAU] | Area %  |
|--------|---------------|------|-------------|--------------|--------------|---------|
| 1      | 16.466        | BB   | 1.7246      | 1444.12146   | 10.17042     | 1.9372  |
| 2      | 33.364        | BB   | 4.5427      | 7.31020e4    | 191.45258    | 98.0628 |

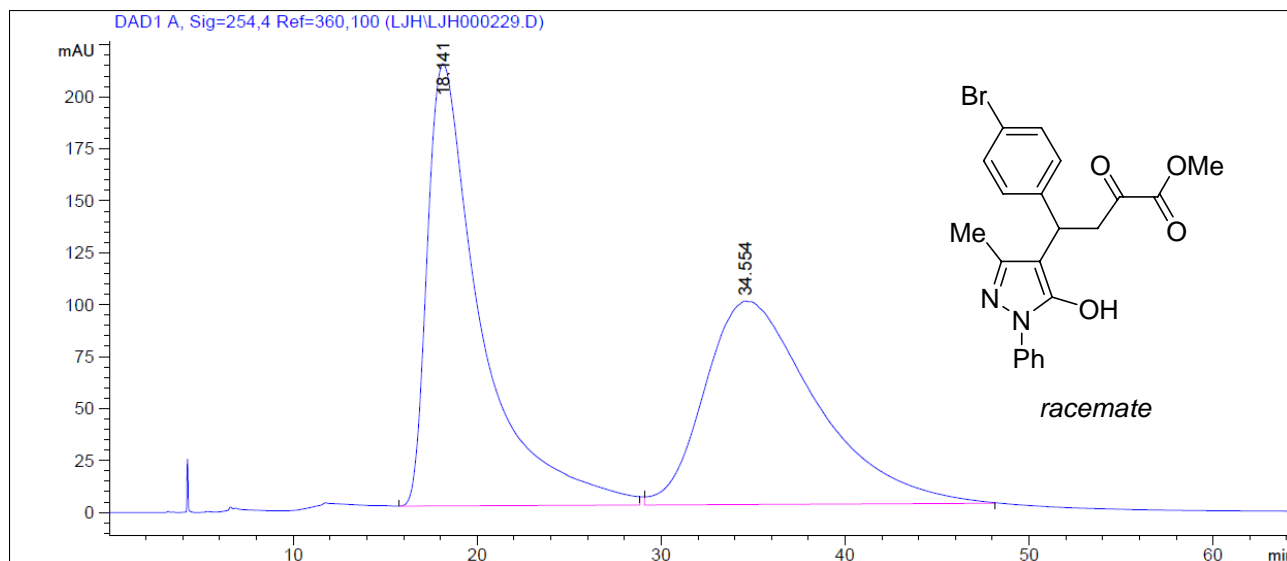

| Peak # | RetTime [min] | Type | Width [min] | Area [mAU*s] | Height [mAU] | Area %  |
|--------|---------------|------|-------------|--------------|--------------|---------|
| 1      | 18.141        | BB   | 2.8918      | 4.30720e4    | 212.94366    | 51.0373 |
| 2      | 34.554        | BB   | 5.0149      | 4.13212e4    | 97.92583     | 48.9627 |

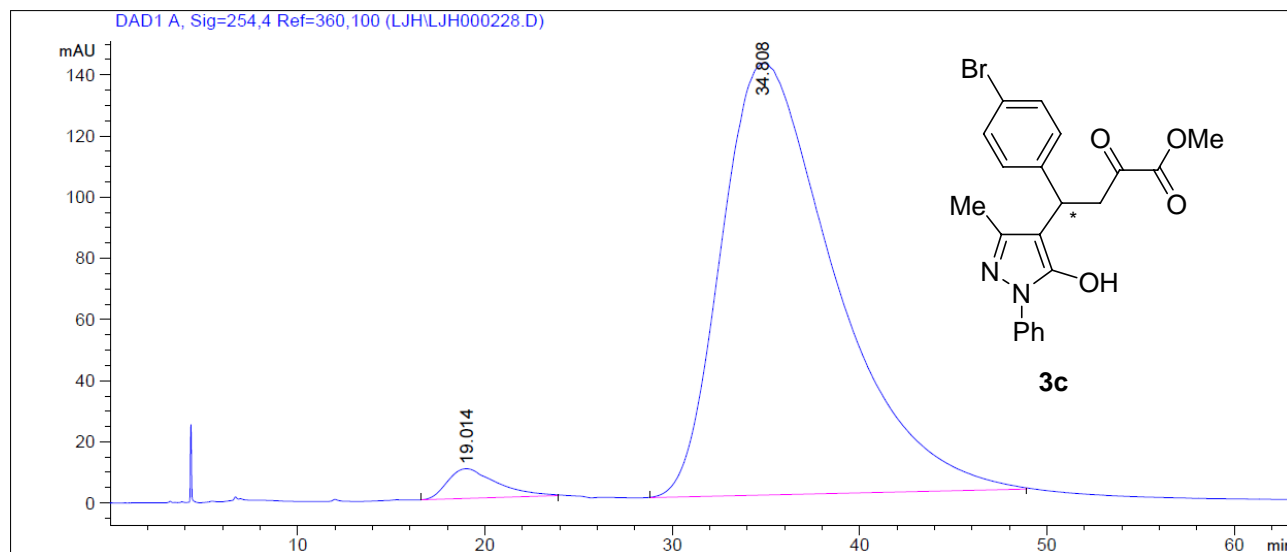

| Peak # | RetTime [min] | Type | Width [min] | Area [mAU*s] | Height [mAU] | Area %  |
|--------|---------------|------|-------------|--------------|--------------|---------|
| 1      | 19.014        | BB   | 2.1506      | 1763.59753   | 9.73004      | 2.8783  |
| 2      | 34.808        | BB   | 4.9690      | 5.95078e4    | 141.31151    | 97.1217 |

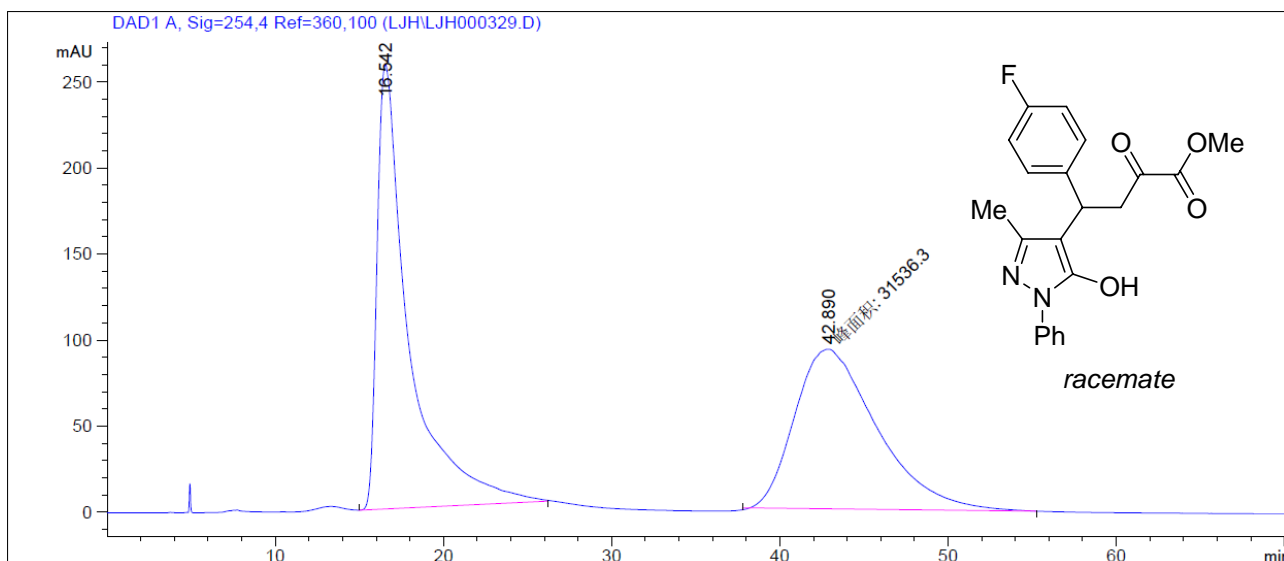

| Peak # | RetTime [min] | Type | Width [min] | Area [mAU*s] | Height [mAU] | Area %  |
|--------|---------------|------|-------------|--------------|--------------|---------|
| 1      | 16.542        | VB   | 1.8607      | 3.40153e4    | 258.23987    | 51.8909 |
| 2      | 42.890        | MM T | 5.6672      | 3.15363e4    | 92.74480     | 48.1091 |

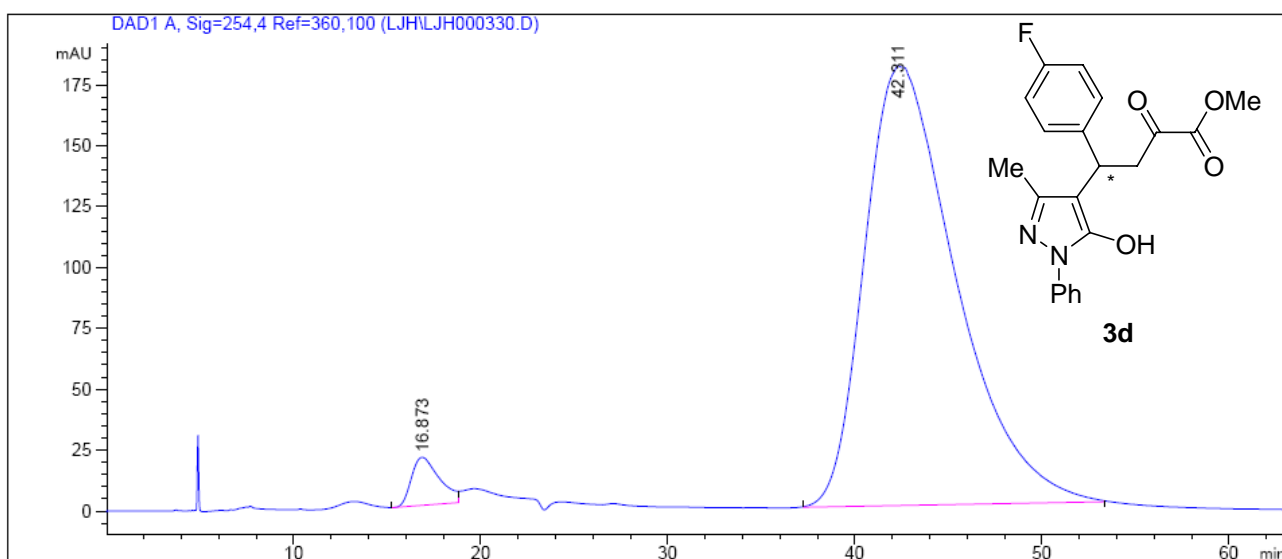

| Peak # | RetTime [min] | Type | Width [min] | Area [mAU*s] | Height [mAU] | Area %  |
|--------|---------------|------|-------------|--------------|--------------|---------|
| 1      | 16.873        | VV   | 1.5016      | 2057.18164   | 19.67927     | 3.2506  |
| 2      | 42.311        | BB   | 4.0215      | 6.12284e4    | 180.50168    | 96.7494 |

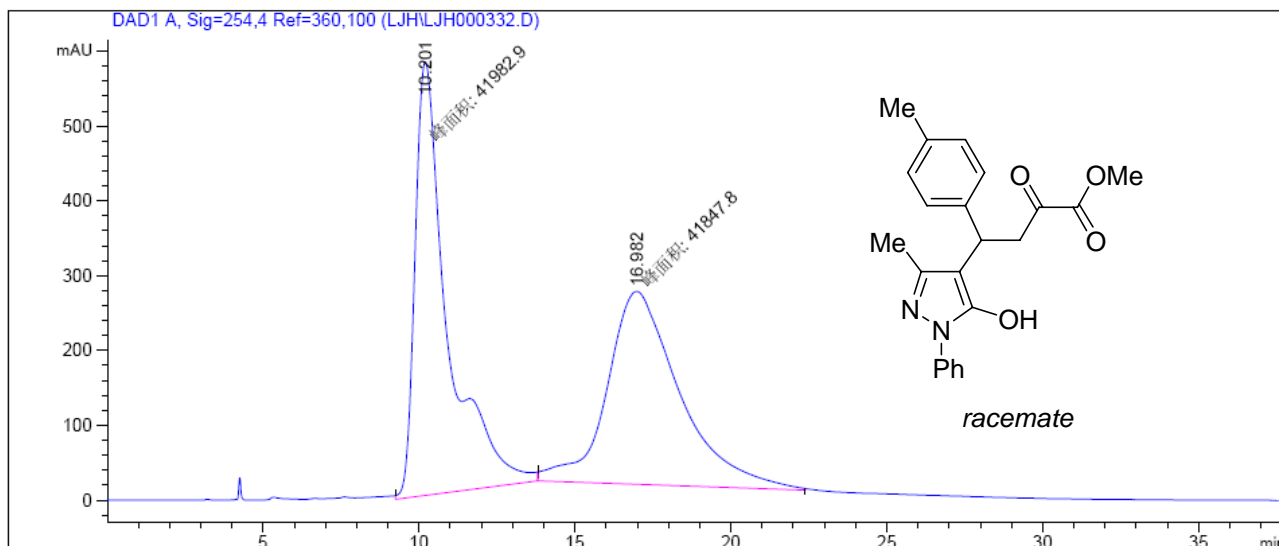

| Peak # | RetTime [min] | Type | Width [min] | Area [mAU*s] | Height [mAU] | Area %  |
|--------|---------------|------|-------------|--------------|--------------|---------|
| 1      | 10.201        | MM T | 1.2073      | 4.19829e4    | 579.55566    | 50.0806 |
| 2      | 16.982        | MM T | 2.7057      | 4.18478e4    | 257.77478    | 49.9194 |

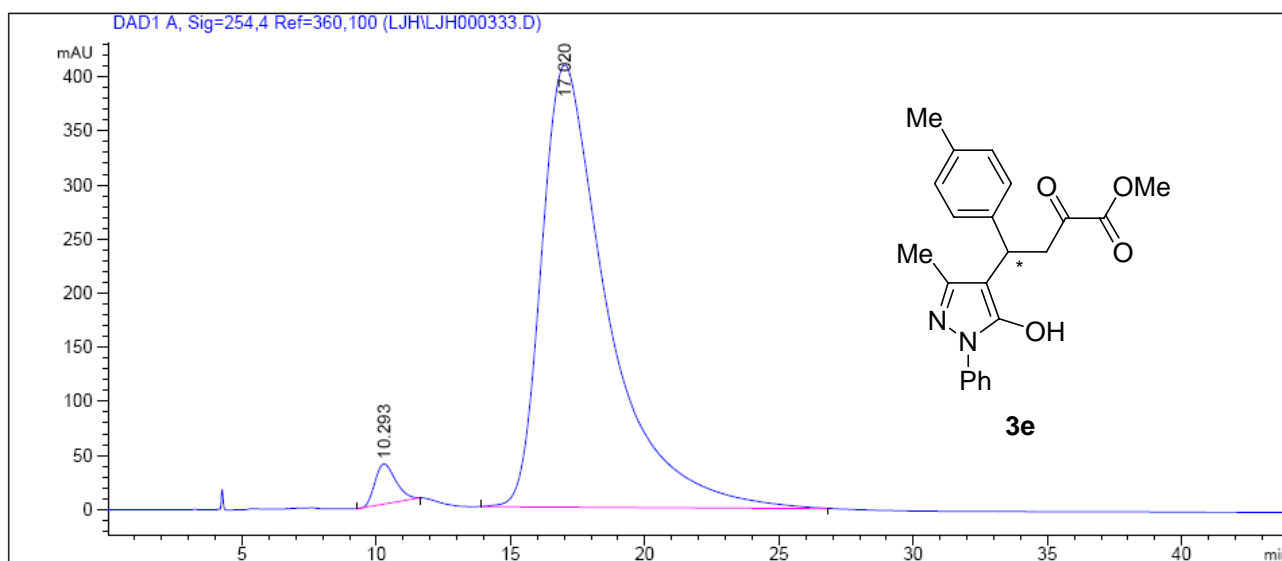

| Peak # | RetTime [min] | Type | Width [min] | Area [mAU*s] | Height [mAU] | Area %  |
|--------|---------------|------|-------------|--------------|--------------|---------|
| 1      | 10.293        | BB S | 0.8341      | 1984.02417   | 37.08880     | 2.7612  |
| 2      | 17.020        | BB   | 2.5240      | 6.98706e4    | 408.80084    | 97.2388 |

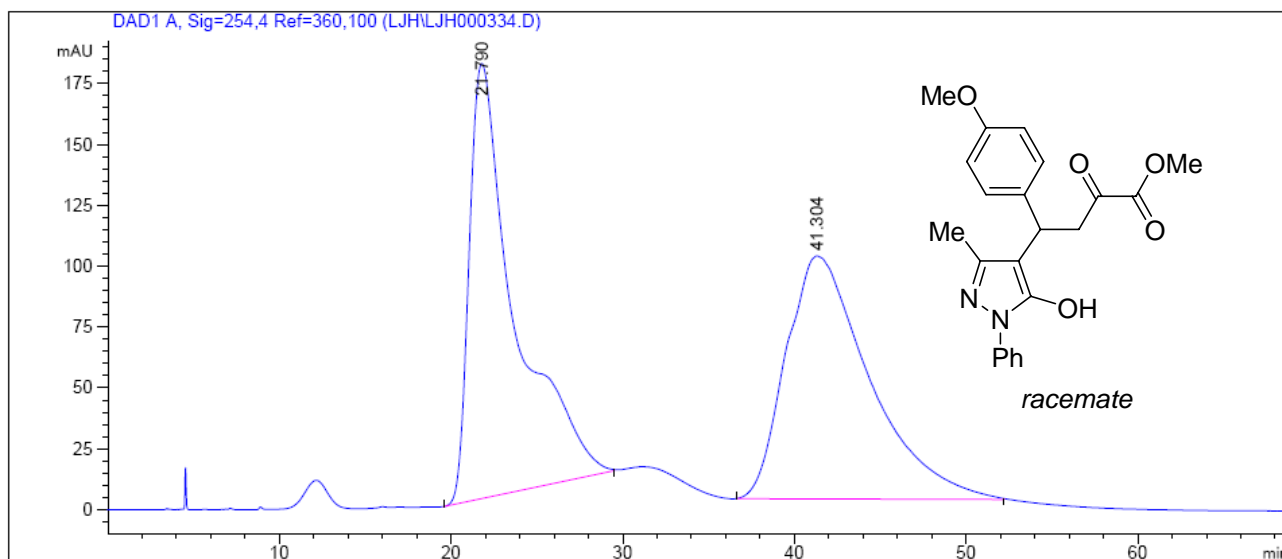

| Peak # | RetTime [min] | Type | Width [min] | Area [mAU*s] | Height [mAU] | Area %  |
|--------|---------------|------|-------------|--------------|--------------|---------|
| 1      | 21.790        | BB   | 2.5380      | 3.29277e4    | 178.67567    | 49.3636 |
| 2      | 41.304        | BB   | 4.0323      | 3.37767e4    | 99.80573     | 50.6364 |

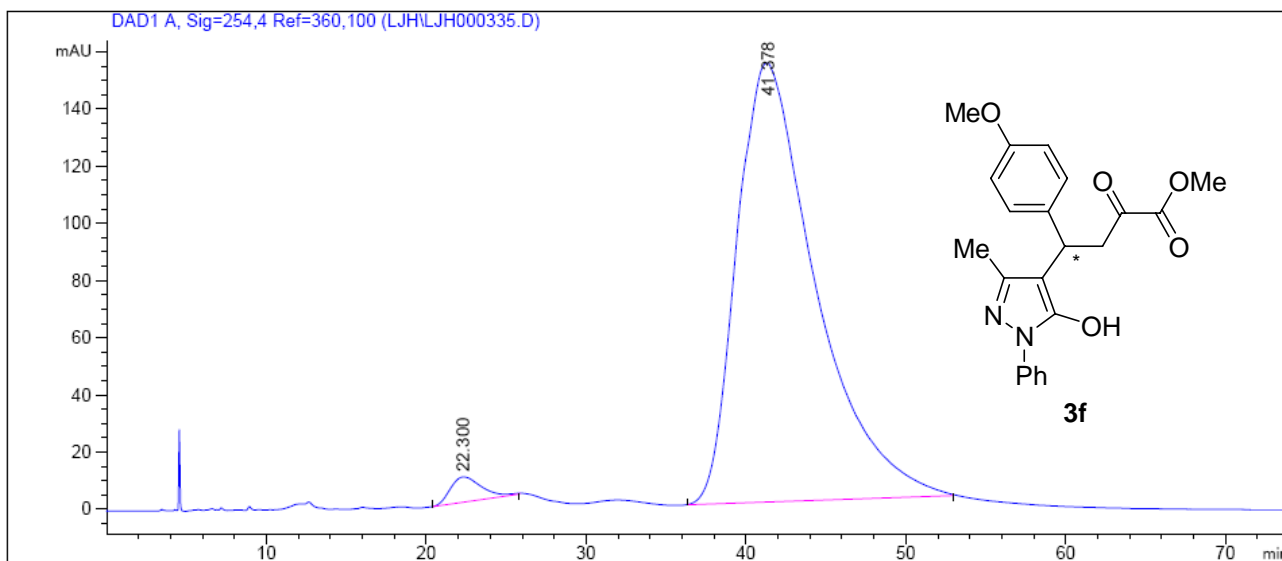

| Peak # | RetTime [min] | Type | Width [min] | Area [mAU*s] | Height [mAU] | Area %  |
|--------|---------------|------|-------------|--------------|--------------|---------|
| 1      | 22.300        | BB   | 1.6597      | 1187.81494   | 8.82834      | 2.2074  |
| 2      | 41.378        | BB   | 4.0778      | 5.26238e4    | 153.57130    | 97.7926 |



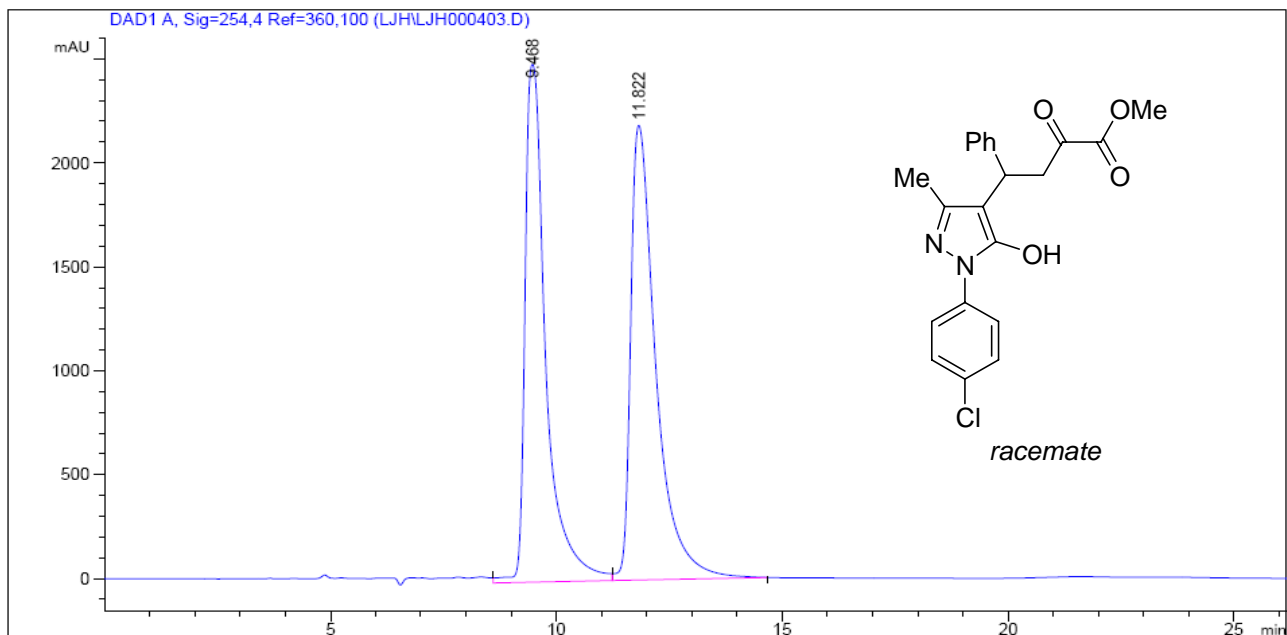

| Peak # | RetTime [min] | Type | Width [min] | Area [mAU*s] | Height [mAU] | Area %  |
|--------|---------------|------|-------------|--------------|--------------|---------|
| 1      | 9.468         | VV   | 0.4785      | 7.99860e4    | 2491.77100   | 48.4748 |
| 2      | 11.822        | VB   | 0.5774      | 8.50192e4    | 2187.67310   | 51.5252 |

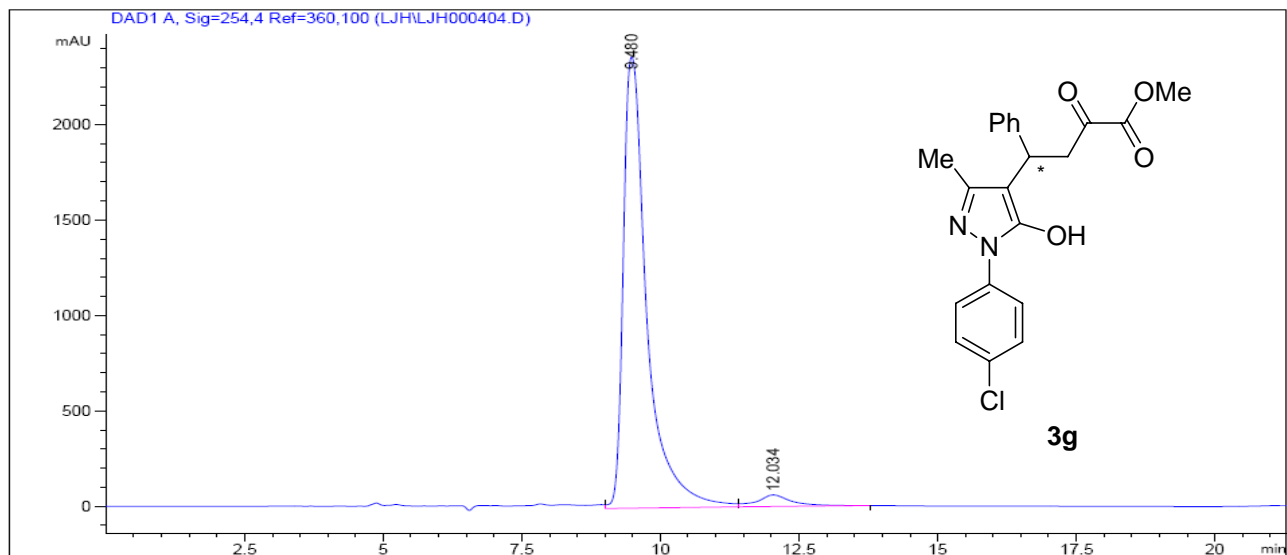

| Peak # | RetTime [min] | Type | Width [min] | Area [mAU*s] | Height [mAU] | Area %  |
|--------|---------------|------|-------------|--------------|--------------|---------|
| 1      | 9.480         | VB   | 0.4422      | 7.02079e4    | 2365.66406   | 96.1565 |
| 2      | 12.034        | BB   | 0.6345      | 2806.31494   | 61.94527     | 3.8435  |

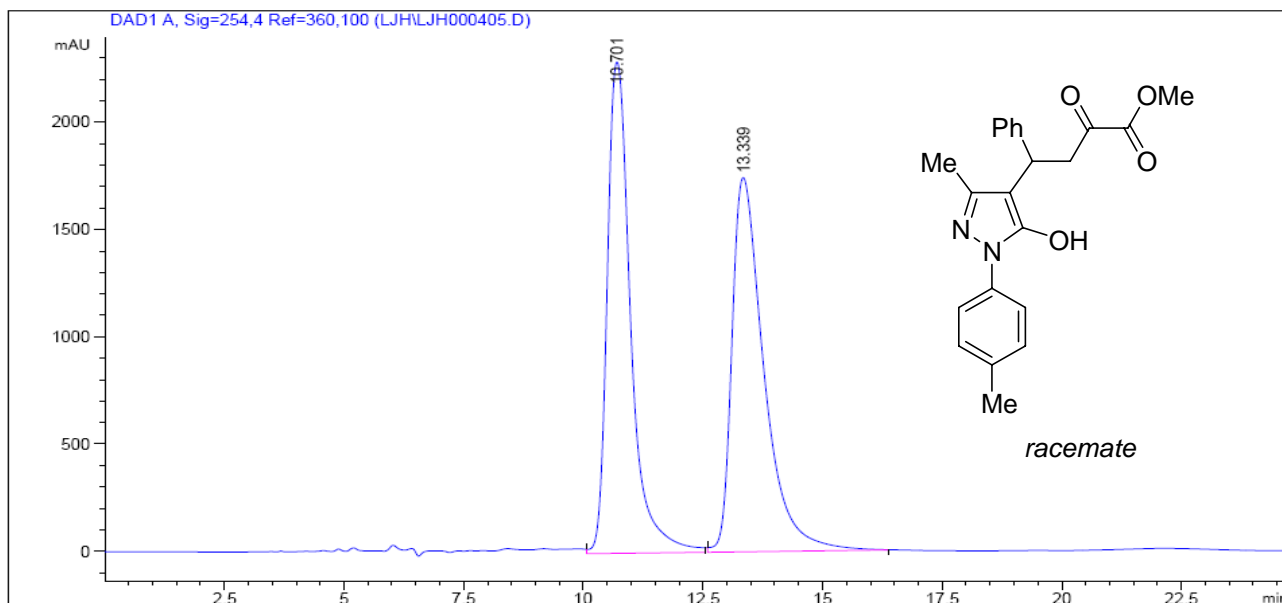

| Peak # | RetTime [min] | Type | Width [min] | Area [mAU*s] | Height [mAU] | Area %  |
|--------|---------------|------|-------------|--------------|--------------|---------|
| 1      | 10.701        | VB   | 0.5214      | 7.84477e4    | 2291.38892   | 49.1110 |
| 2      | 13.339        | BB   | 0.6994      | 8.12876e4    | 1745.28809   | 50.8890 |

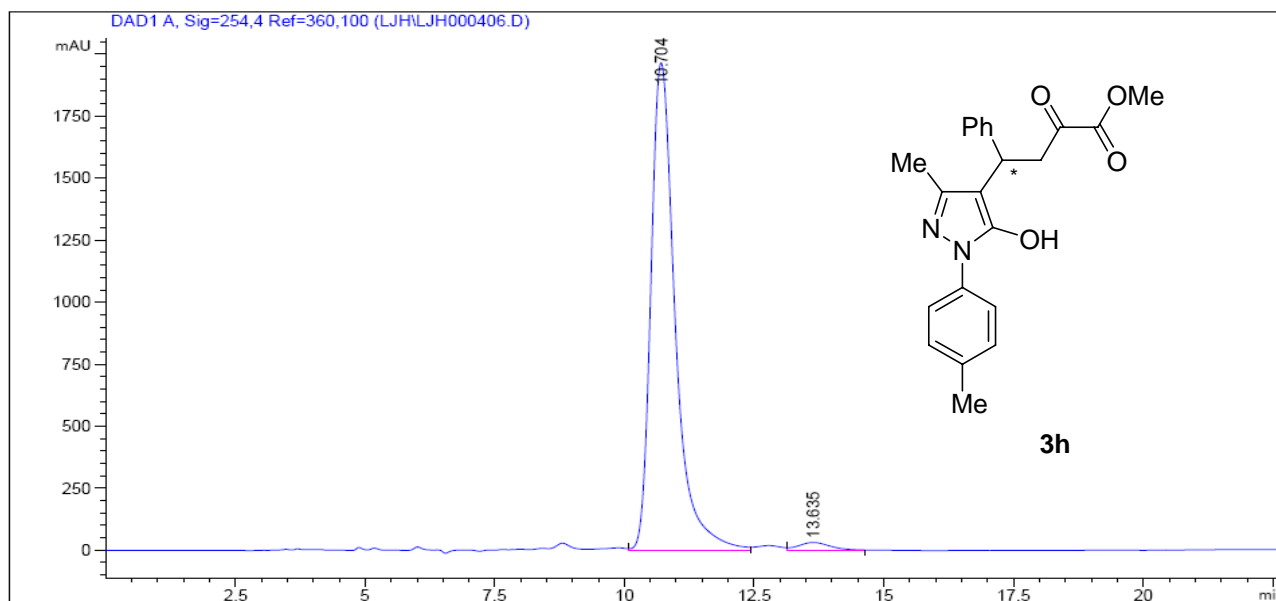

| Peak # | RetTime [min] | Type | Width [min] | Area [mAU*s] | Height [mAU] | Area %  |
|--------|---------------|------|-------------|--------------|--------------|---------|
| 1      | 10.704        | VV   | 0.4939      | 6.40300e4    | 1966.45276   | 97.9791 |
| 2      | 13.635        | VB   | 0.6388      | 1320.67395   | 31.26507     | 2.0209  |

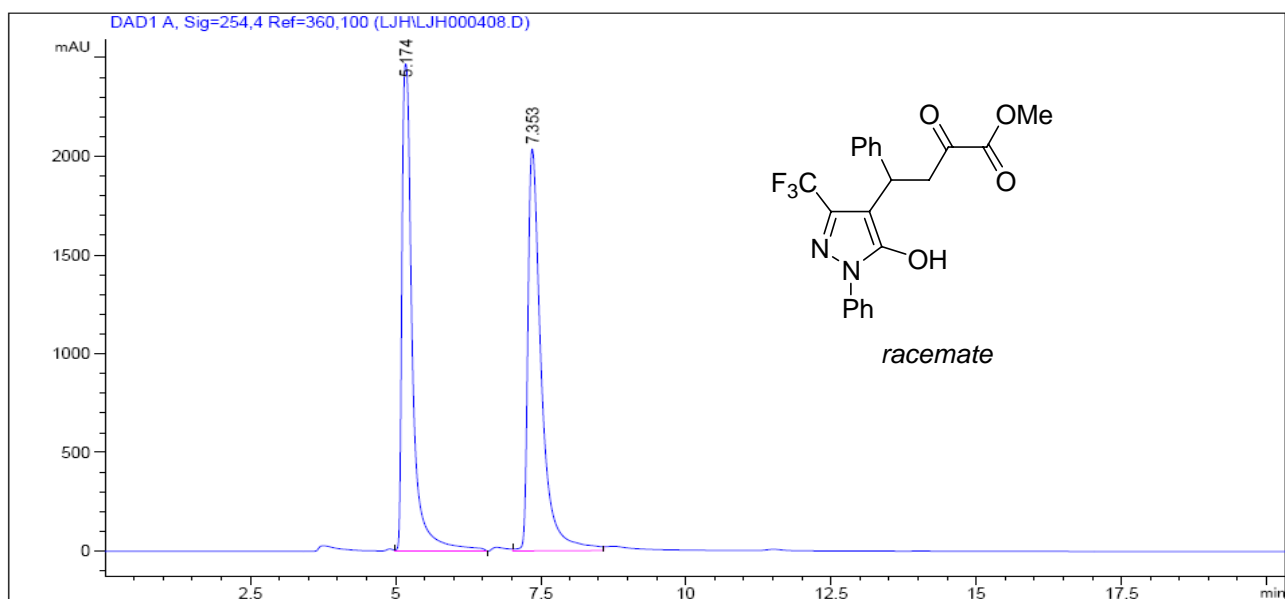

| Peak # | RetTime [min] | Type | Width [min] | Area [mAU*s] | Height [mAU] | Area %  |
|--------|---------------|------|-------------|--------------|--------------|---------|
| 1      | 5.174         | VV   | 0.1883      | 3.09475e4    | 2467.78687   | 48.5053 |
| 2      | 7.353         | VV   | 0.2402      | 3.28548e4    | 2037.00769   | 51.4947 |

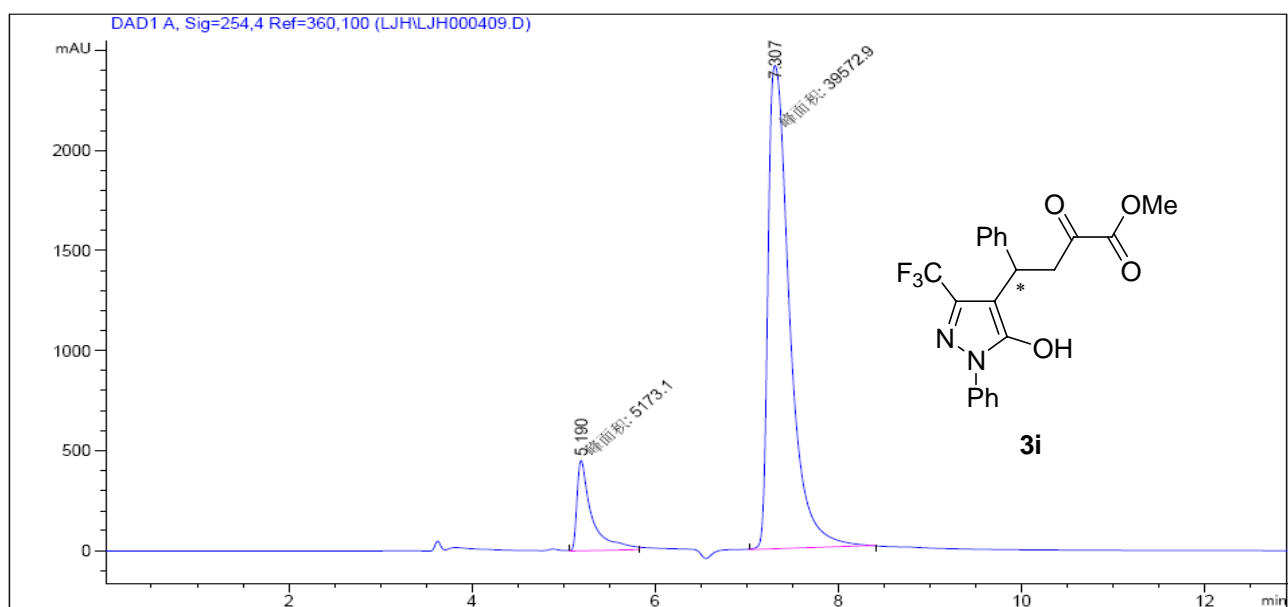

| Peak # | RetTime [min] | Type | Width [min] | Area [mAU*s] | Height [mAU] | Area %  |
|--------|---------------|------|-------------|--------------|--------------|---------|
| 1      | 5.190         | MM T | 0.1905      | 5173.10254   | 452.66339    | 11.5610 |
| 2      | 7.307         | MM T | 0.2730      | 3.95729e4    | 2415.75464   | 88.4390 |

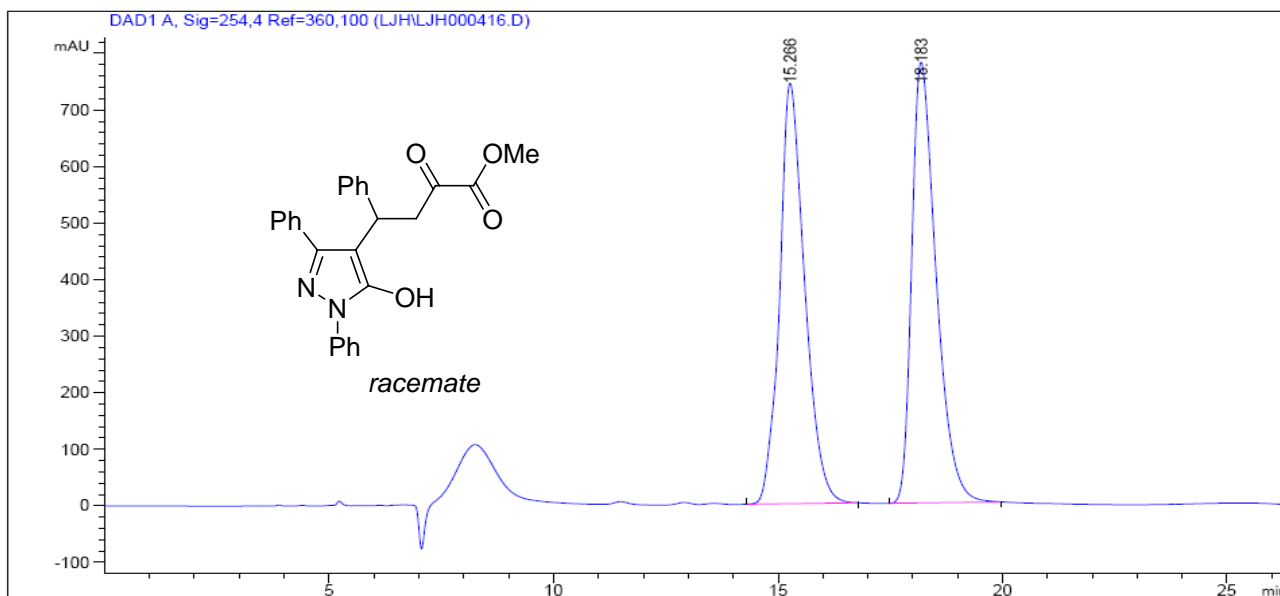

| Peak # | RetTime [min] | Type | Width [min] | Area [mAU*s] | Height [mAU] | Area %  |
|--------|---------------|------|-------------|--------------|--------------|---------|
| 1      | 15.266        | BB   | 0.5744      | 2.89701e4    | 743.83087    | 49.5988 |
| 2      | 18.183        | BB   | 0.5726      | 2.94388e4    | 779.57568    | 50.4012 |

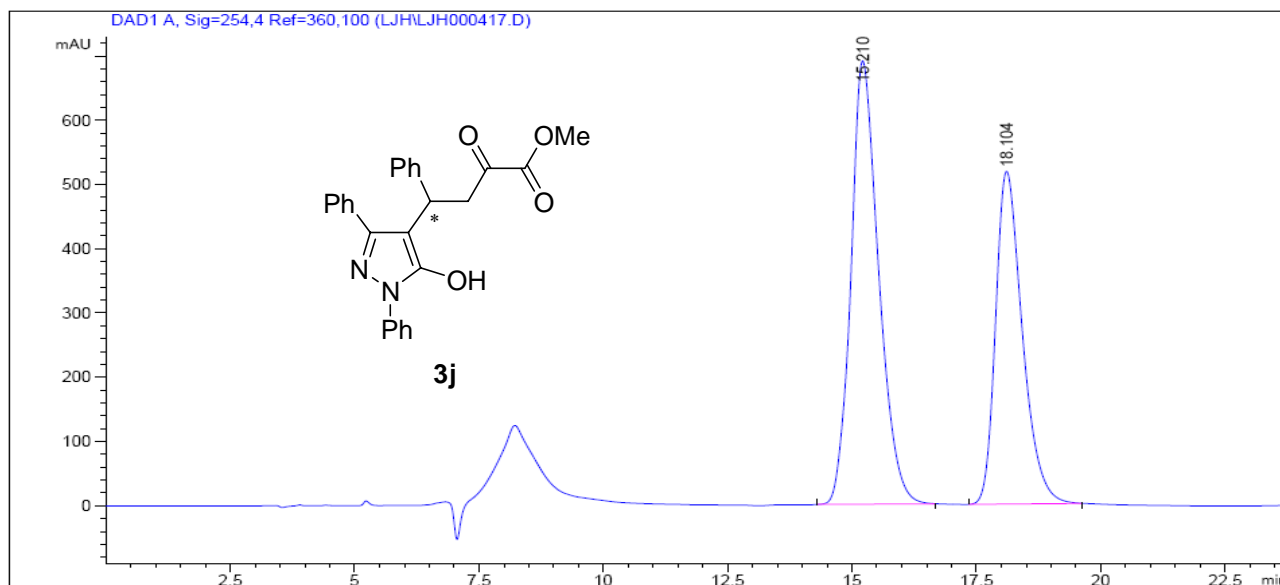

| Peak # | RetTime [min] | Type | Width [min] | Area [mAU*s] | Height [mAU] | Area %  |
|--------|---------------|------|-------------|--------------|--------------|---------|
| 1      | 15.210        | BB   | 0.5788      | 2.68079e4    | 690.79364    | 58.0347 |
| 2      | 18.104        | BB   | 0.5683      | 1.93850e4    | 518.30542    | 41.9653 |

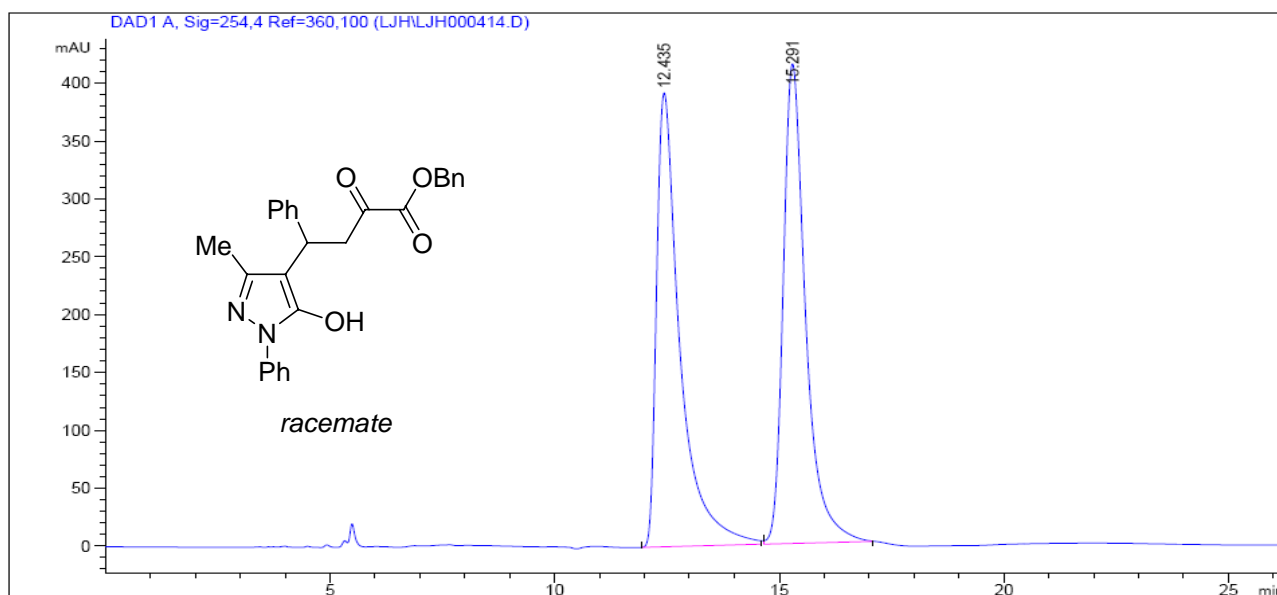

| Peak # | RetTime [min] | Type | Width [min] | Area [mAU*s] | Height [mAU] | Area %  |
|--------|---------------|------|-------------|--------------|--------------|---------|
| 1      | 12.435        | BB   | 0.5313      | 1.42285e4    | 392.18283    | 49.7789 |
| 2      | 15.291        | BB   | 0.5200      | 1.43549e4    | 414.55887    | 50.2211 |

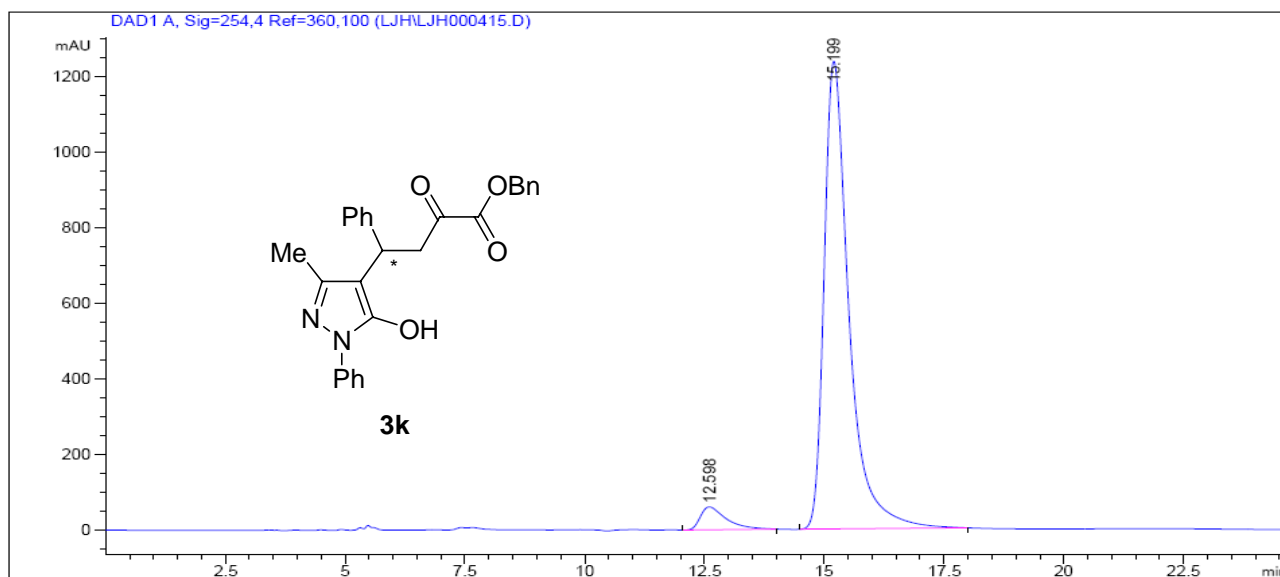

| Peak # | RetTime [min] | Type | Width [min] | Area [mAU*s] | Height [mAU] | Area %  |
|--------|---------------|------|-------------|--------------|--------------|---------|
| 1      | 12.598        | BB   | 0.5599      | 2303.59546   | 60.81211     | 4.8977  |
| 2      | 15.199        | BB   | 0.5416      | 4.47311e4    | 1237.85815   | 95.1023 |

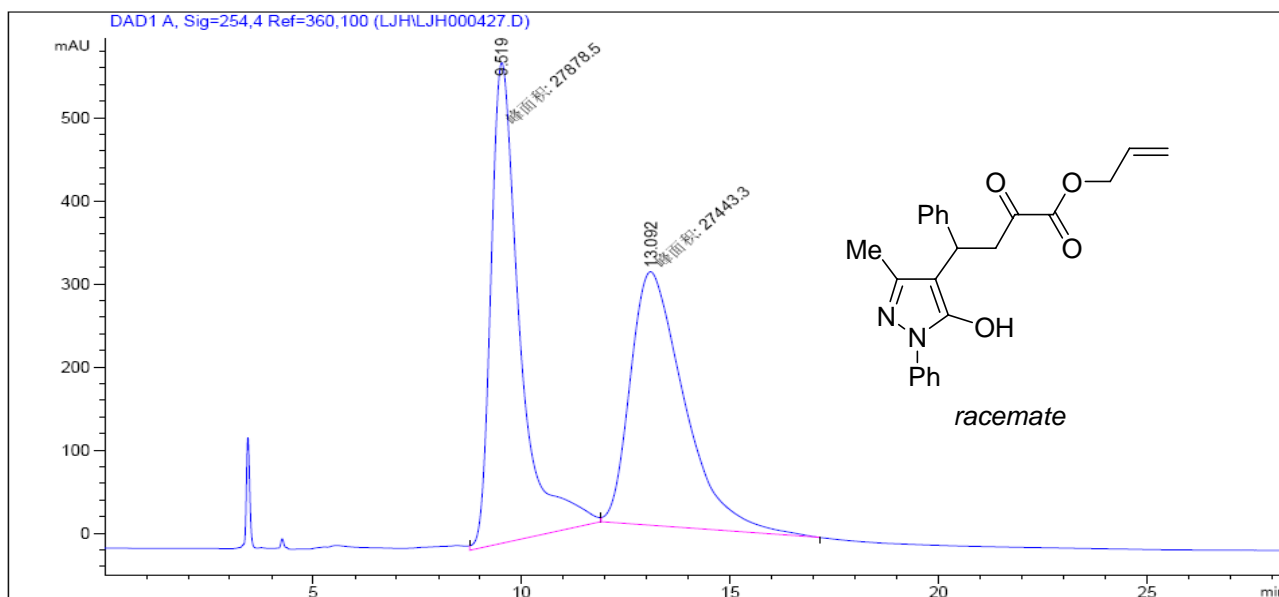

| Peak # | RetTime [min] | Type | Width [min] | Area [mAU*s] | Height [mAU] | Area %  |
|--------|---------------|------|-------------|--------------|--------------|---------|
| 1      | 9.519         | MM T | 0.8037      | 2.78785e4    | 578.16174    | 50.3934 |
| 2      | 13.092        | MM T | 1.4999      | 2.74433e4    | 304.94064    | 49.6066 |

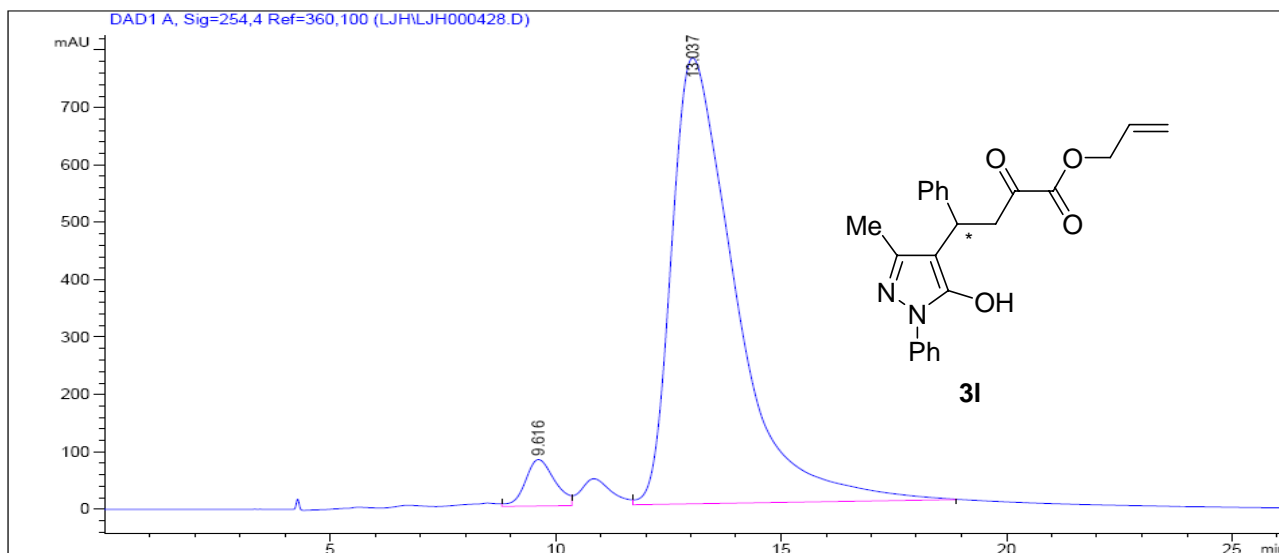

| Peak # | RetTime [min] | Type | Width [min] | Area [mAU*s] | Height [mAU] | Area %  |
|--------|---------------|------|-------------|--------------|--------------|---------|
| 1      | 9.616         | VV   | 0.6894      | 3719.24609   | 81.35339     | 4.6208  |
| 2      | 13.037        | VB   | 1.4248      | 7.67706e4    | 776.92584    | 95.3792 |

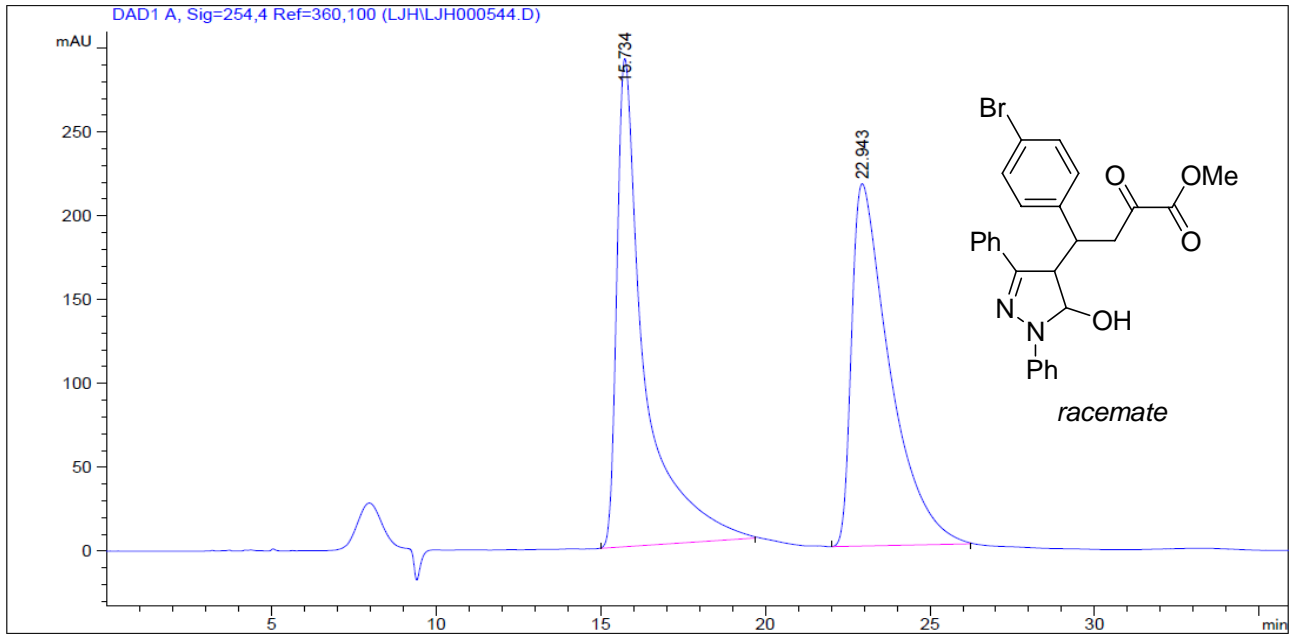

| Peak # | RetTime [min] | Type | Width [min] | Area [mAU*s] | Height [mAU] | Area %  |
|--------|---------------|------|-------------|--------------|--------------|---------|
| 1      | 15.734        | BB   | 0.8192      | 1.69086e4    | 291.29074    | 49.3272 |
| 2      | 22.943        | BB   | 1.1633      | 1.73699e4    | 216.19415    | 50.6728 |

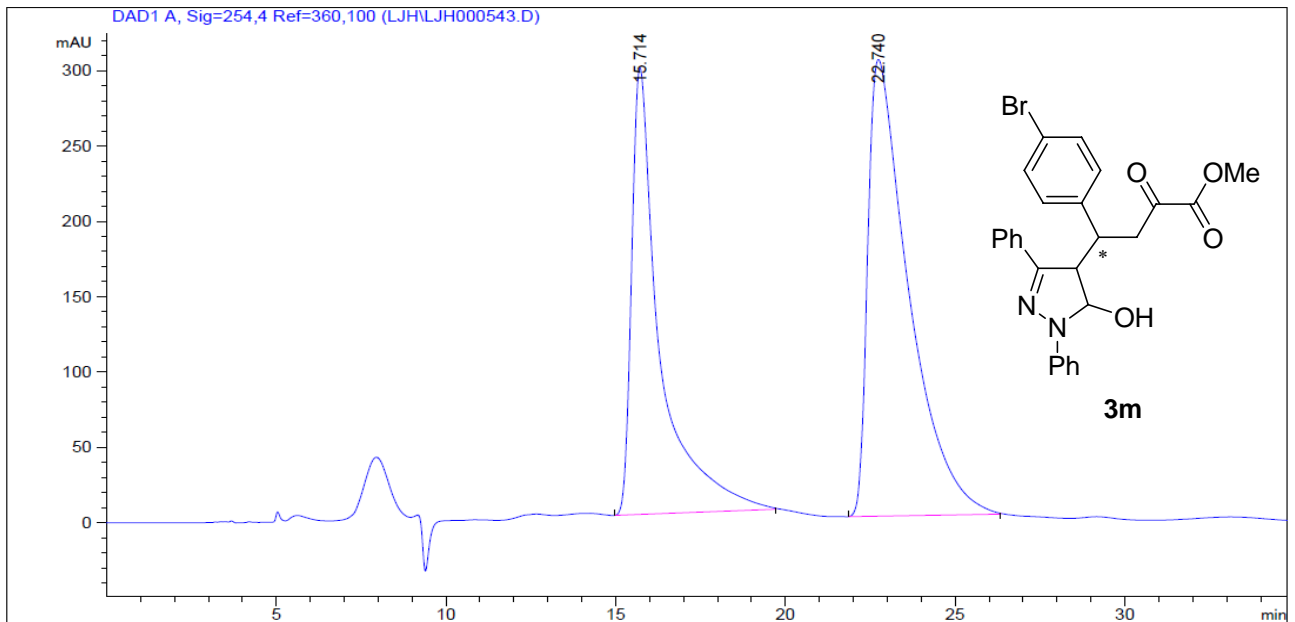

| Peak # | RetTime [min] | Type | Width [min] | Area [mAU*s] | Height [mAU] | Area %  |
|--------|---------------|------|-------------|--------------|--------------|---------|
| 1      | 15.714        | BB   | 0.8184      | 1.71827e4    | 296.35895    | 40.3570 |
| 2      | 22.740        | BB   | 1.2176      | 2.53940e4    | 303.06577    | 59.6430 |

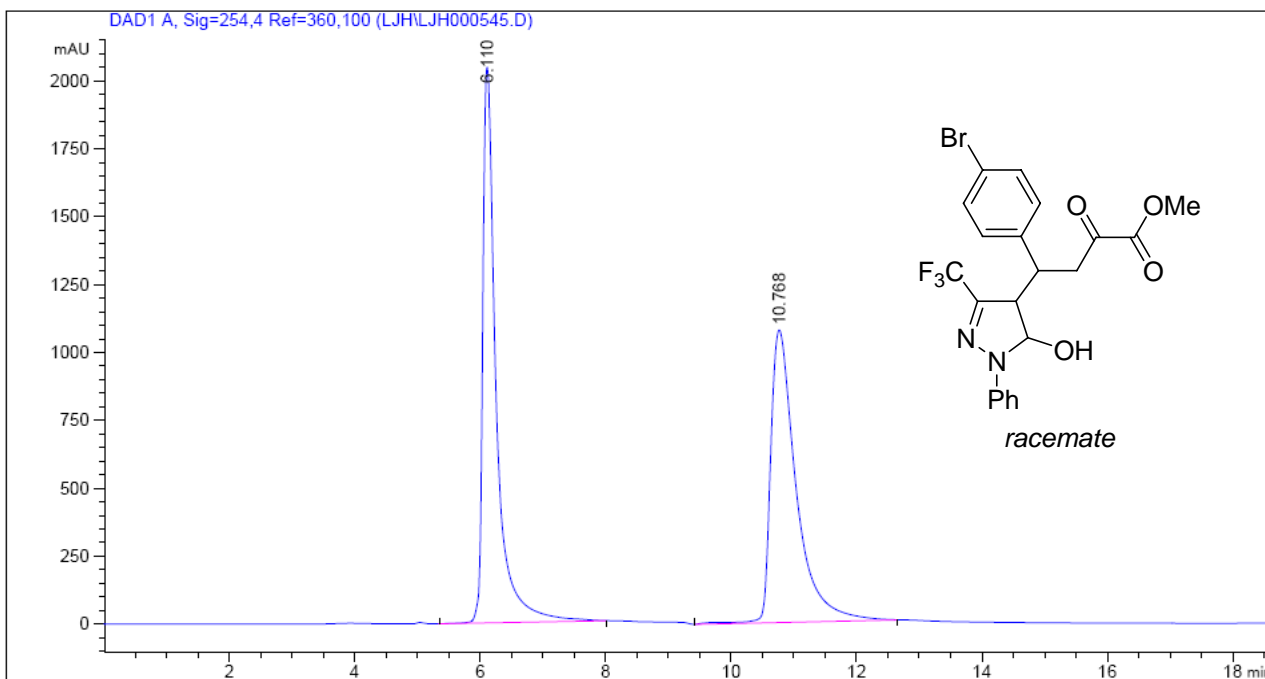

| Peak # | RetTime [min] | Type | Width [min] | Area [mAU*s] | Height [mAU] | Area %  |
|--------|---------------|------|-------------|--------------|--------------|---------|
| 1      | 6.110         | BB   | 0.2181      | 3.05407e4    | 2046.73596   | 49.9873 |
| 2      | 10.768        | BB   | 0.4229      | 3.05562e4    | 1077.18225   | 50.0127 |

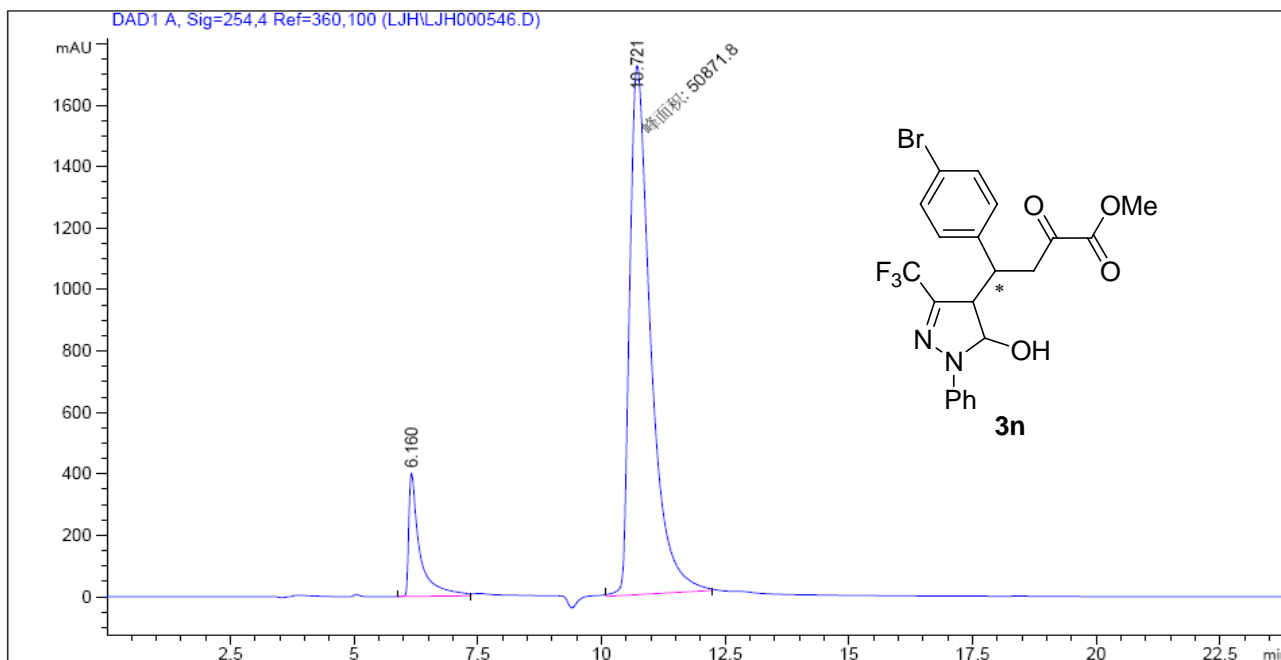

| Peak # | RetTime [min] | Type | Width [min] | Area [mAU*s] | Height [mAU] | Area %  |
|--------|---------------|------|-------------|--------------|--------------|---------|
| 1      | 6.160         | BV   | 0.2179      | 6262.91602   | 401.63135    | 10.9617 |
| 2      | 10.721        | MM T | 0.4923      | 5.08718e4    | 1722.26709   | 89.0383 |



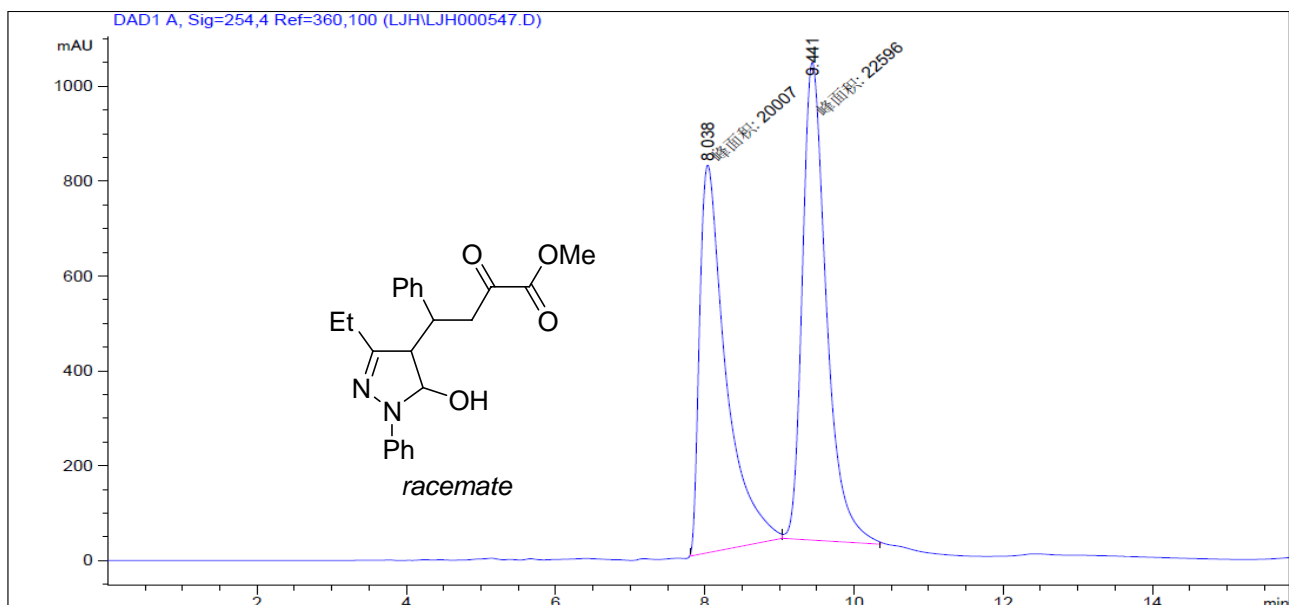

| Peak # | RetTime [min] | Type | Width [min] | Area [mAU*s] | Height [mAU] | Area %  |
|--------|---------------|------|-------------|--------------|--------------|---------|
| 1      | 8.038         | MM T | 0.4079      | 2.00070e4    | 817.57117    | 46.9614 |
| 2      | 9.441         | MM T | 0.3736      | 2.25960e4    | 1007.97662   | 53.0386 |

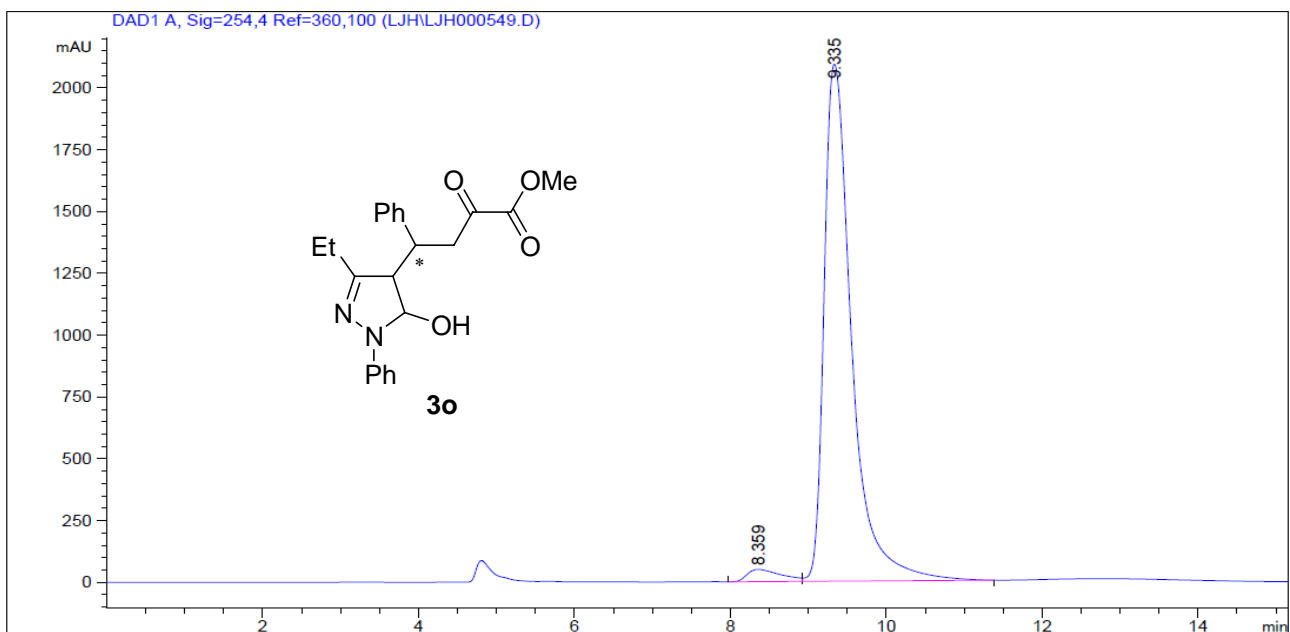

| Peak # | RetTime [min] | Type | Width [min] | Area [mAU*s] | Height [mAU] | Area %  |
|--------|---------------|------|-------------|--------------|--------------|---------|
| 1      | 8.359         | BV   | 0.4461      | 1496.64209   | 49.59305     | 2.8281  |
| 2      | 9.335         | VB   | 0.3709      | 5.14237e4    | 2091.41895   | 97.1719 |

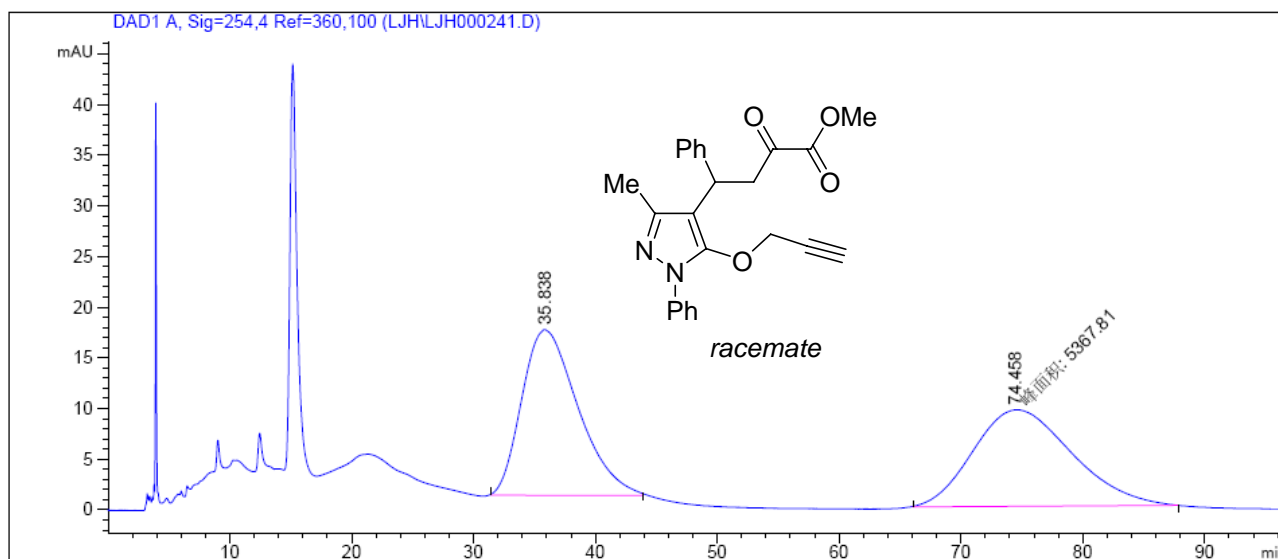

| Peak # | RetTime [min] | Type | Width [min] | Area [mAU*s] | Height [mAU] | Area %  |
|--------|---------------|------|-------------|--------------|--------------|---------|
| 1      | 35.838        | BB   | 3.8206      | 5233.25635   | 16.35706     | 49.3654 |
| 2      | 74.458        | MM T | 9.3923      | 5367.80811   | 9.52524      | 50.6346 |

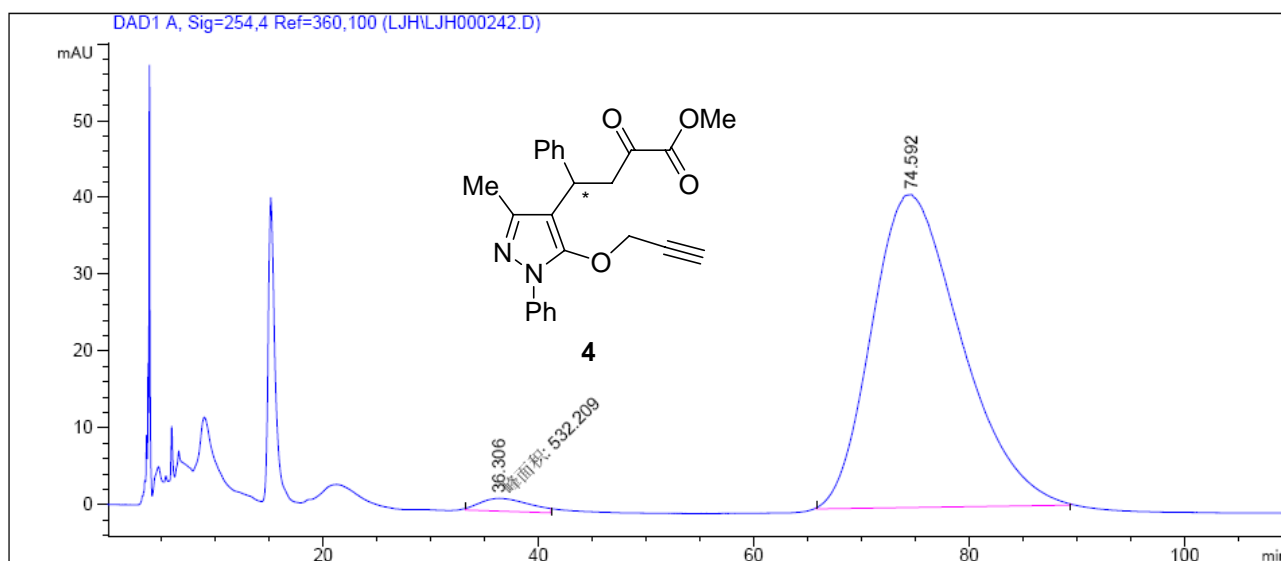

| Peak # | RetTime [min] | Type | Width [min] | Area [mAU*s] | Height [mAU] | Area %  |
|--------|---------------|------|-------------|--------------|--------------|---------|
| 1      | 36.306        | MM T | 5.3090      | 532.20947    | 1.67077      | 2.2103  |
| 2      | 74.592        | BB   | 6.8147      | 2.35465e4    | 40.74197     | 97.7897 |
